# Supplementary material for: Metainterfaces with mechanical, thermal, and active programming properties based on programmable orientation-distributed biometric architectonics
Source: Royal Society of Chemistry journal article supplement (doi:10.1039/d4mh00570h), 2024-01-01
Supplement: d4mh00570h8.pdf [file d4mh00570h8.pdf]

Supplementary Information for

**Metainterface with mechanical, thermal, and active programming based on  
programmable orientation-distributed biometric architectonics**

Zhenyang Gao<sup>1,2</sup>, Hongze Wang<sup>1,2,3,4\*</sup>, Pengyuan Ren<sup>1,2</sup>, Gengchen Zheng<sup>1,2</sup>, Yang Lu<sup>5</sup>, Bokang Peng<sup>1,2</sup>, Zijue Tang<sup>1,2</sup>, Yi Wu<sup>1,2,3\*</sup>, Haowei Wang<sup>1,2,3</sup>

<sup>1</sup>State Key Laboratory of Metal Matrix Composites, Shanghai Jiao Tong University, Shanghai, 200240, China.

<sup>2</sup>School of Materials Science and Engineering, Shanghai Jiao Tong University, Shanghai, 200240, China.

<sup>3</sup>Institute of Alumics Materials, Shanghai Jiao Tong University (Anhui), Huaibei, 235000, China.

<sup>4</sup>Shanghai Key Laboratory of Material Laser Processing and Modification, Shanghai, 200240, China.

<sup>5</sup>Department of Mechanical Engineering, the University of Hong Kong, Hong Kong, 999077, China.

**\*Corresponding authors.** E-mail: hz.wang@sjtu.edu.cn, eagle51@sjtu.edu.cn

**This PDF file includes:**

Supplementary Notes 1 to 3

Figures S1 to S30

Tables S1 to S7

Captions for Movies S1 to S7

**Other supporting materials for this manuscript include the following:**

Movies S1 to S7

30 **Supplementary Note 1.** Design rationales, advantages, and crack extension

31 mechanisms for metainterface.

32 Programming the interface properties requires highly anisotropic behaviors of the  
33 interface design unit. In comparison to various sharp edges found in biological  
34 structures<sup>1, 2, 3</sup> (Figure S1), honeybee stinger has evolved with highly anisotropic  
35 geometries, characterized by their backward barbs, rendering it an ideal choice for  
36 designing interface elements with programmable anisotropic mechanical and  
37 dynamical properties<sup>4, 5, 6</sup>. Those stingers have three-dimensional features with limited  
38 sizes ranging from micro- to nanoscales<sup>7</sup>, making them difficult to observe, reconstruct,  
39 and manufacture.

40 To interpret the underlying mechanisms responsibly for the mechanical  
41 advantages of the metainterface featuring XCT-rebuild biostructures in comparison to  
42 interfaces with highly simplified biometric geometries, we quantified crack extensions  
43 mechanisms (theoretical diagram in Figure S27 (a)) from the substrate to the interface  
44 design area using the ZEISS Xradia 520 Versa X-ray microscopic equipment, offering  
45 a resolution of 29.203  $\mu\text{m}$  (Figure S27 (b-d) and Supplementary movies Movie S1, also  
46 consult Figure S19 and Section 4.5 in Methods for additional details). In contrast to the  
47 interfaces with the simplified biometric geometries, it is evident that a greater number  
48 of microcracks extend from the substrate to the XCT-rebuild stingers. This mechanism  
49 underscores the enhanced effectiveness of XCT-rebuild biostructures in leveraging the  
50 rigid interface surface to redistribute mechanical stress and fracture energies during  
51 interfacial decoupling, substantiating the mechanical advancements brought about by  
52 the XCT-rebuild geometries in this study. The fracture process of the metainterface is  
53 simulated using finite element analysis (FEA) as shown in Figure S28. The simulation  
54 reveals that the XCT-reconstructed stinger geometry initiates microcracks, which  
55 gradually extend to form a major crack leading to complete fracture. This  
56 microcracking mechanism allows significant stress distribution to the substrate  
57 surrounding the stinger geometry, enhancing the mechanical modulus, strength, and  
58 absorbed interfacial energy during the interface decoupling process. In addition, we  
59 assessed the designability of different interfaces in Figure S29. Existing designs (Figure  
60 S29 (a-b)) often feature simple empirical or bioinspired geometries with limited control  
61 over interface anisotropic properties in a single direction. In contrast, the metainterface  
62 (Figure S29 (c)) consists of a minimum design unit, the single stinger, which orients  
63 itself to provide highly programmable and localized thermomechanical behaviors that  
64 were previously unattainable.

65 **Supplementary Note 2.** Effects of metainterfaces on composite metamaterials with  
66 bending-dominated and stretch-dominated lattice implants.  
67 In bending-dominated composite metamaterials, there is a 3% (vintiles) to 11% (SHS)  
68 improvement in SEAs compared to their conventional counterparts, while stretch-  
69 dominated metamaterials exhibit a 9% (BCC) to 18% (FCC) improvement in SEAs, as  
70 shown in Figure 3 (c). Stretch-dominated lattices display higher stress-strain curves  
71 compared to bending-dominated structures, and the improvements in SEAs facilitated  
72 by metainterfaces are more pronounced. For example, the results of struct-based lattice  
73 topologies indicate that the SEA improvements in stretch-dominated lattices are 3 to 9  
74 times higher than in bending-dominated lattices. In addition, an increase in the interface  
75 area introduces greater improvements in SEAs, as seen in the case of SHS filled with  
76 metainterfaces, which exhibit a 4-fold improvement in SEAs compared to vintiles.  
77 These results provide valuable design guidelines, suggesting that metainterfaces  
78 with stiffer interface parent geometries and a larger interface contact area yield more  
79 significant mechanical advancements. Furthermore, it is evident that the truss elements  
80 of bending-dominated composite metamaterials (Figure S25) tend to fracture  
81 prematurely compared to the stretch-dominated lattices (Figure 4 (e)). This premature  
82 fracture results in an early separation of the matrix and reduced interface reactions,  
83 which in turn explains the observed early decline in the stress-strain curves in Figure  
84 S24 and the less pronounced improvements in SEAs in bending-dominated structures.  
85 Moreover, the occurrence of interfacial fractures underscores the findings that  
86 increasing the contact interface area equipped with metainterfaces leads to more  
87 effective enhancements in both SEAs and stress-strain curves. In addition, it is observed  
88 that the truss of the bending-dominated composite metamaterials exhibit an early  
89 fracture compared to the stretch-dominated lattices, leading to an early separation of  
90 the matrix and lower interface reactions. This explains the observed earlier decay of the  
91 stress-strain curves, and less effective improvements in SEAs of bending-dominated  
92 structures.

93 **Supplementary Note 3.** Case studies of active programming in amphibious robotic feet  
94 To demonstrate the versatility of the metadisk, we have explored its potential  
95 application in amphibious robotic feet (Figure S26 (a)), which can exhibit  
96 programmable mechanical behaviors on land using the design principles described in  
97 equations (6-8), and achieve programmable flow control in water. By precisely  
98 controlling the concentration angle, this robotic foot can effectively concentrate and  
99 direct the flow to desired locations Figure S26 (b-c), achieving flow modulation ranging  
100 from 96% to 115% of the inlet flows as the concentrating angles vary from  $0^\circ$  to  $60^\circ$   
101 (Figure S26 (d)). This illustrates the potential of employing metainterfaces in systems  
102 with programmable multifunctionalities, such as real-time controlled mechanical  
103 interface reactions and flow controls.

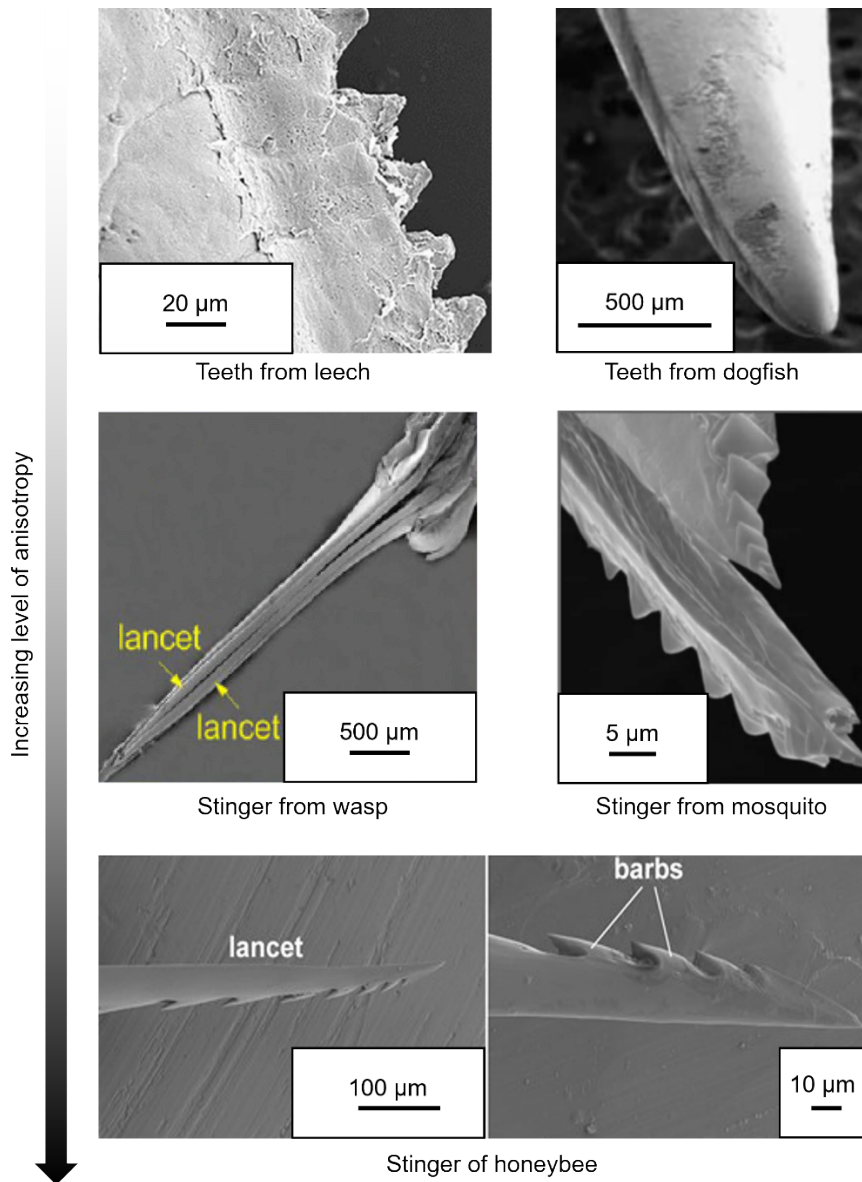

107 Figure S1. The sharp geometries of different species with increasing anisotropy  
108 including the teeth from leech <sup>1</sup>, the teeth from dogfish <sup>2</sup>, stinger from wasp <sup>3</sup>, stinger  
109 from mosquito <sup>2</sup>, and stinger with backward barbs from honeybee <sup>8</sup>.

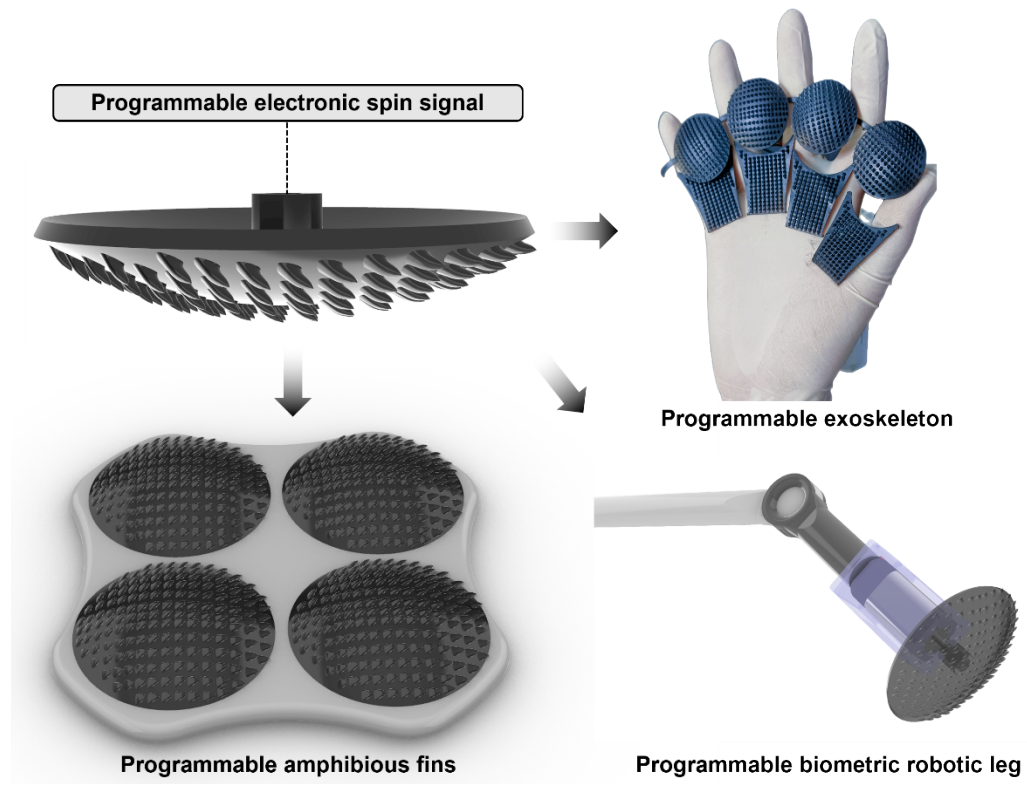

110

111 Figure S2. Potential applications of metadisk in various robotics systems.

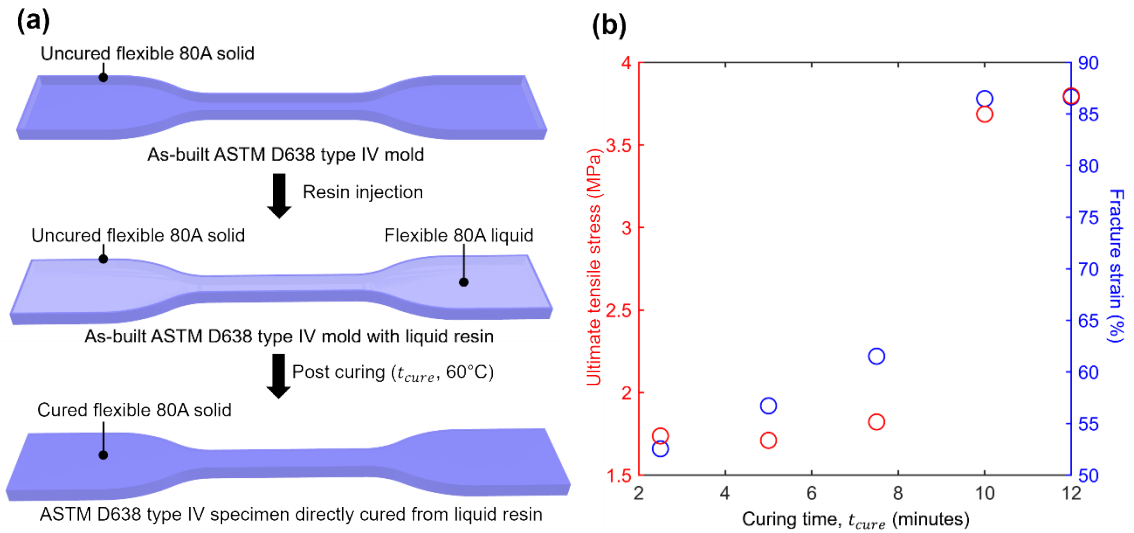

112  
 113 Figure S3. Experimental designs and testing of flexible 80A specimen directly cured  
 114 from liquid. (a) Specimen preparation. (b) Results of the mechanical testing.

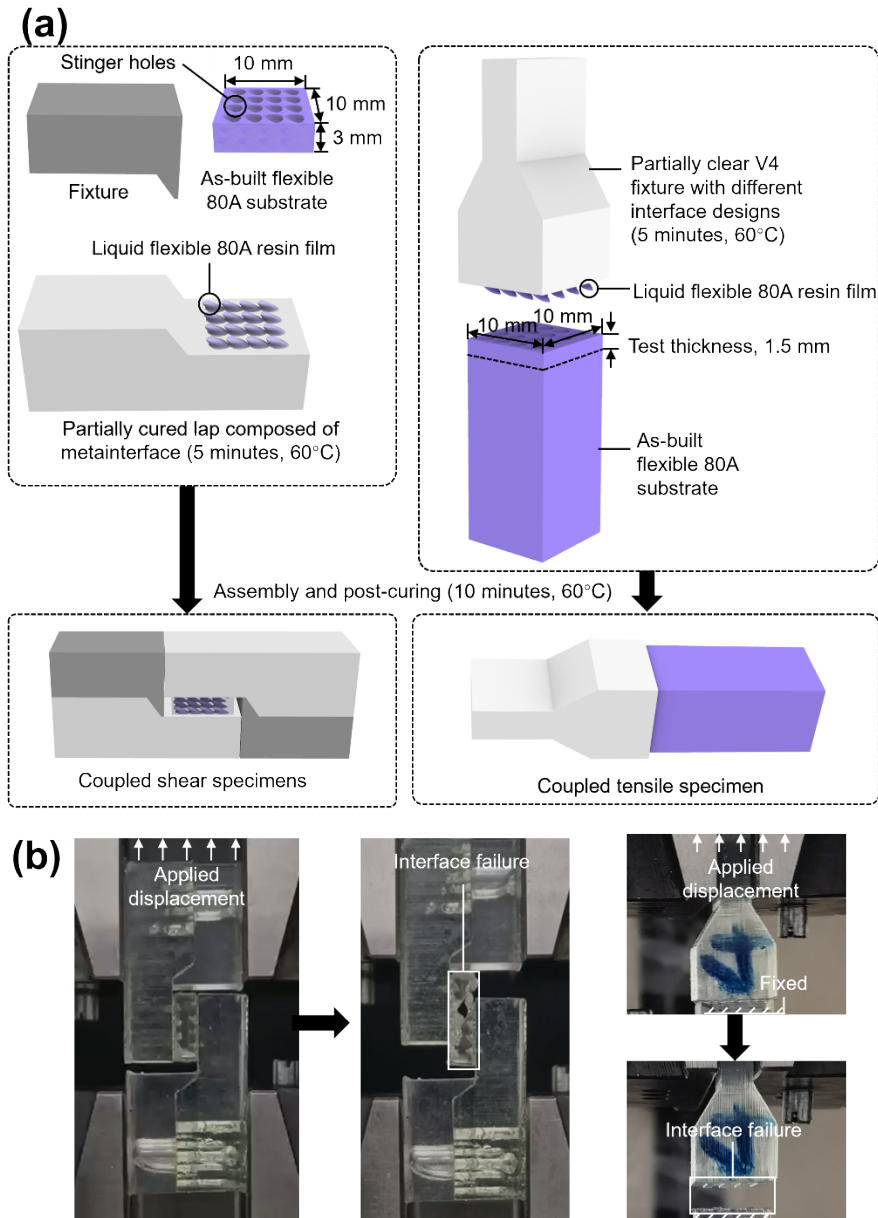

116  
 117 Figure S4. Designs and shear and tensile experiments for the measurement of coupled  
 118 interface energies. (a) Design and preparation of specimens. (b) Experimental process.



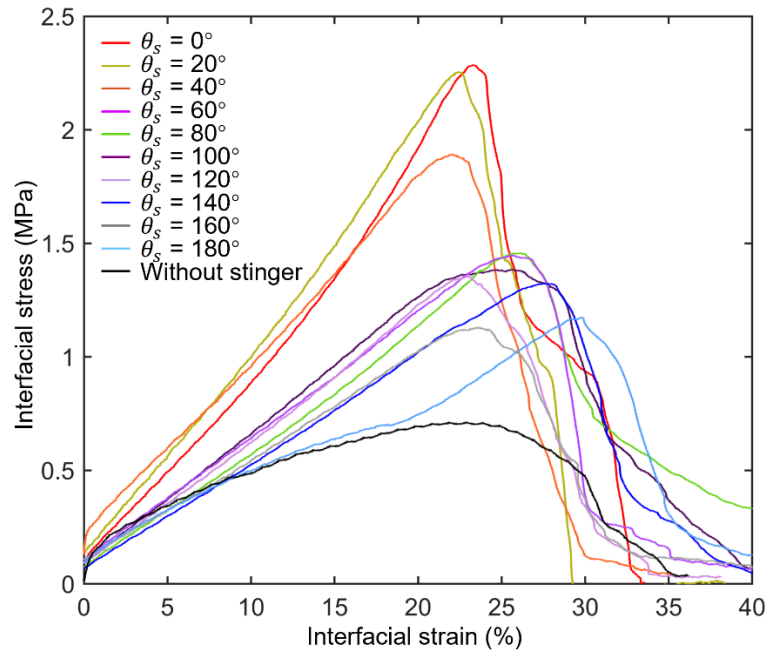

120  
 121 Figure S5. Stress-strain curves of the metainterfaces and interfaces without stingers  
 122 under coupled stress condition.

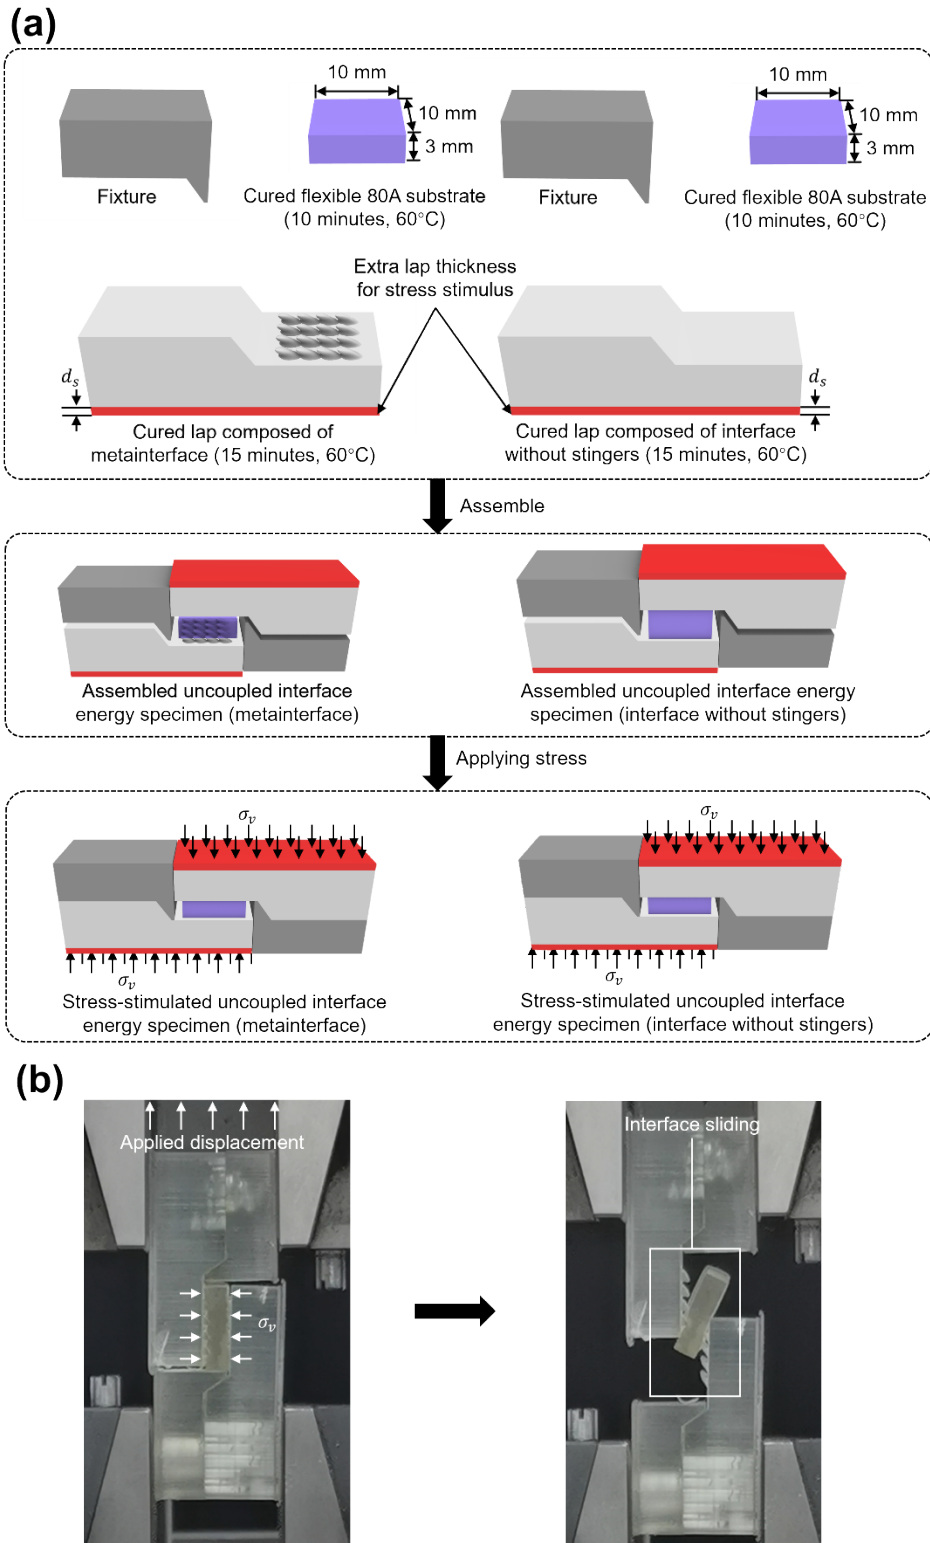

124  
 125 Figure S6. Designs and shear experiments for the measurement of uncoupled interface  
 126 energies. (a) Design and preparation of specimens; and (b) Experimental process.

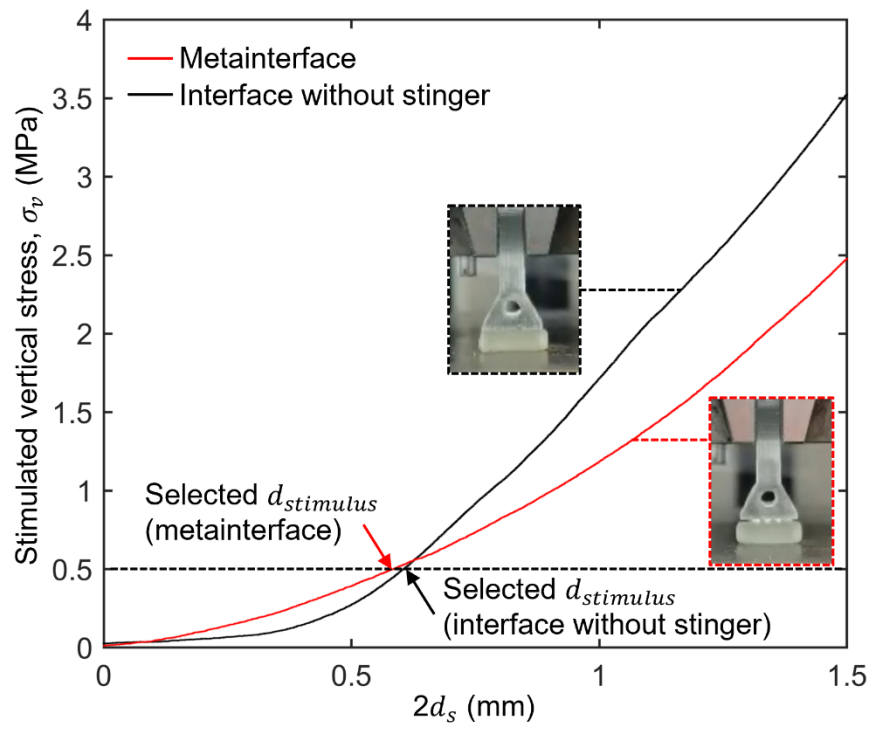

128

129 Figure S7. Stimulated vertical stress of the metainterfaces and interfaces without  
 130 stingers under compression.

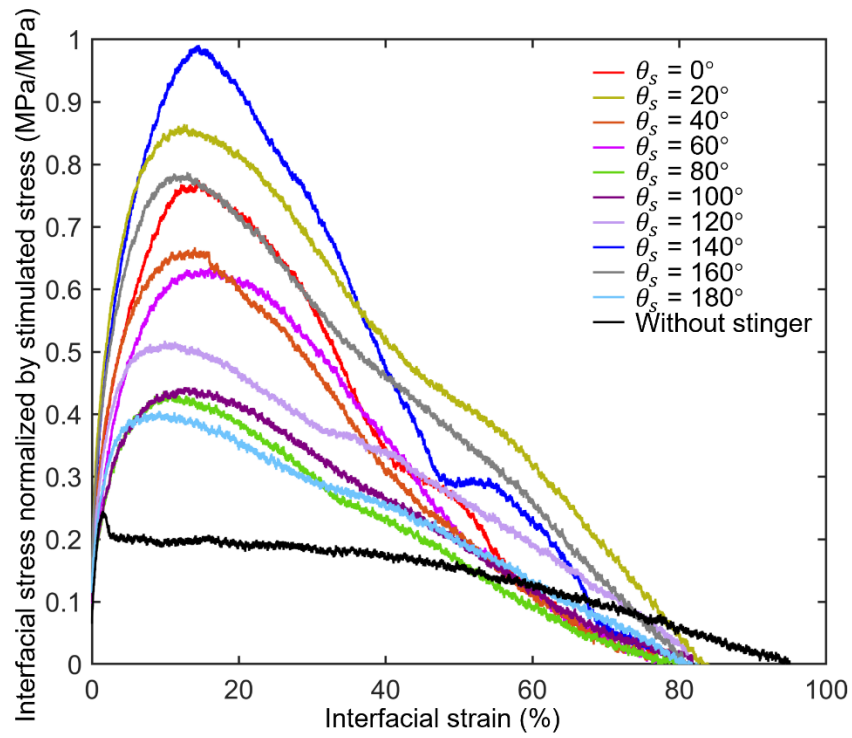

132  
 133 Figure S8. Stress-strain curves of the metainterfaces and interfaces without stingers  
 134 under uncoupled stress condition.

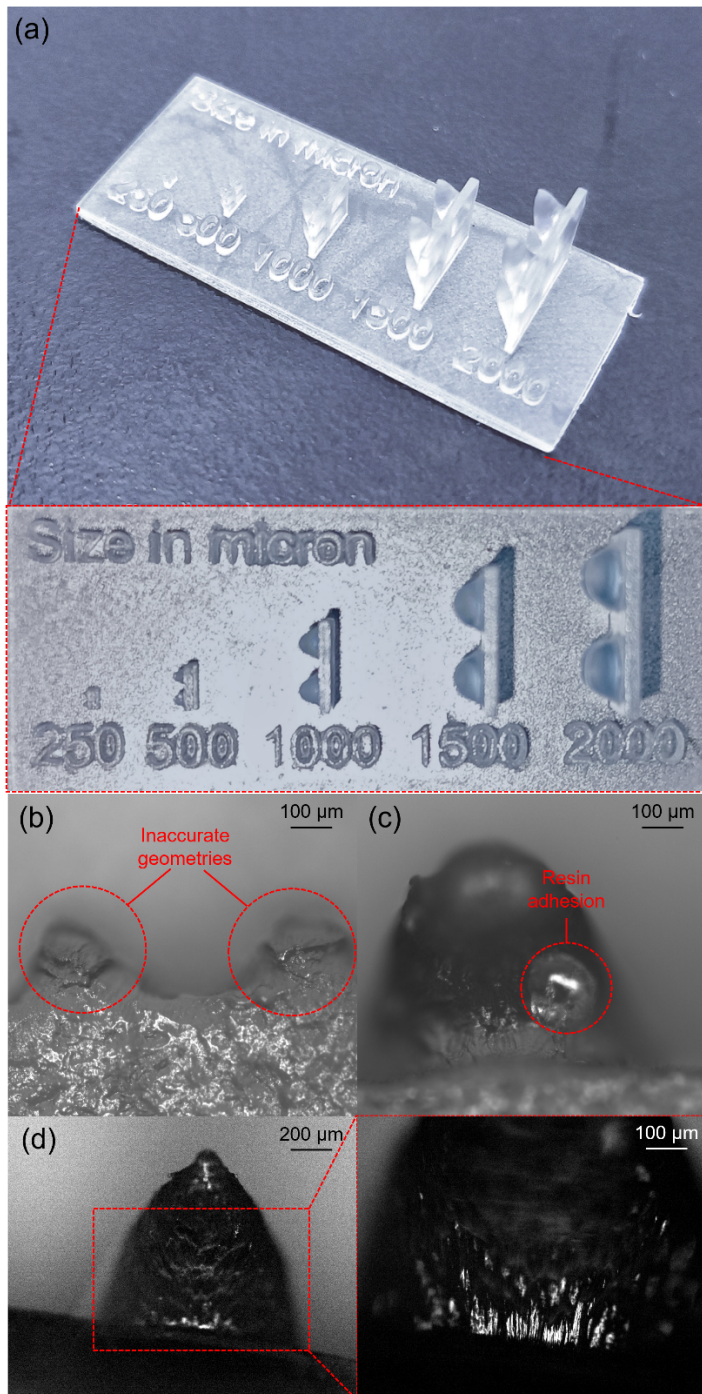

135  
 136 Figure S9. (a) The printed stingers with sizes ranging from 500 to 2000  $\mu\text{m}$ . (b-d)The  
 137 surface finishes captured by Zeiss AX10 optical microscope for the with 250  $\mu\text{m}$   
 138 stingers, 500  $\mu\text{m}$  stingers, 1000  $\mu\text{m}$  stingers, respectively.

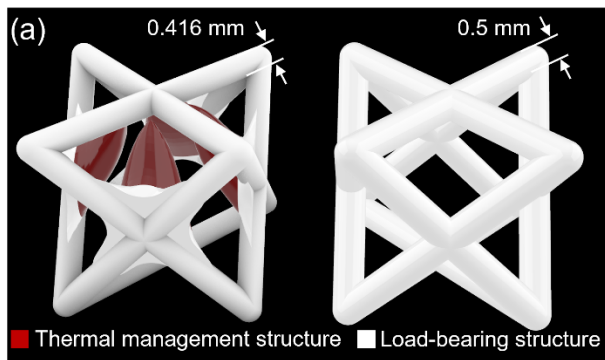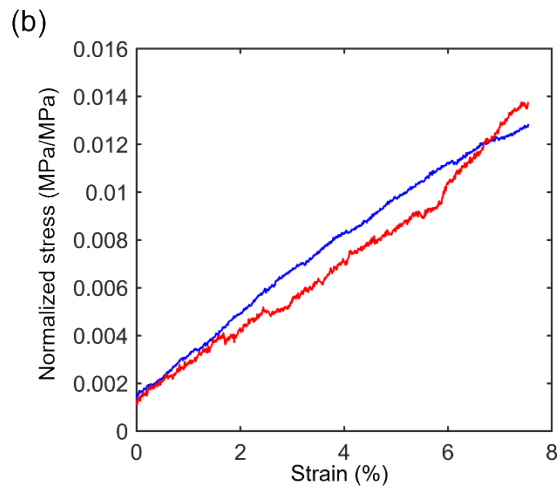

140  
 141 Figure S10. The (a) detailed design images and (b) the stress-strain curves normalized  
 142 by the modulus of the parent material for the thermos-mechanical metamaterial and its  
 143 conventional counterpart designed in this work.

**Training data generation**

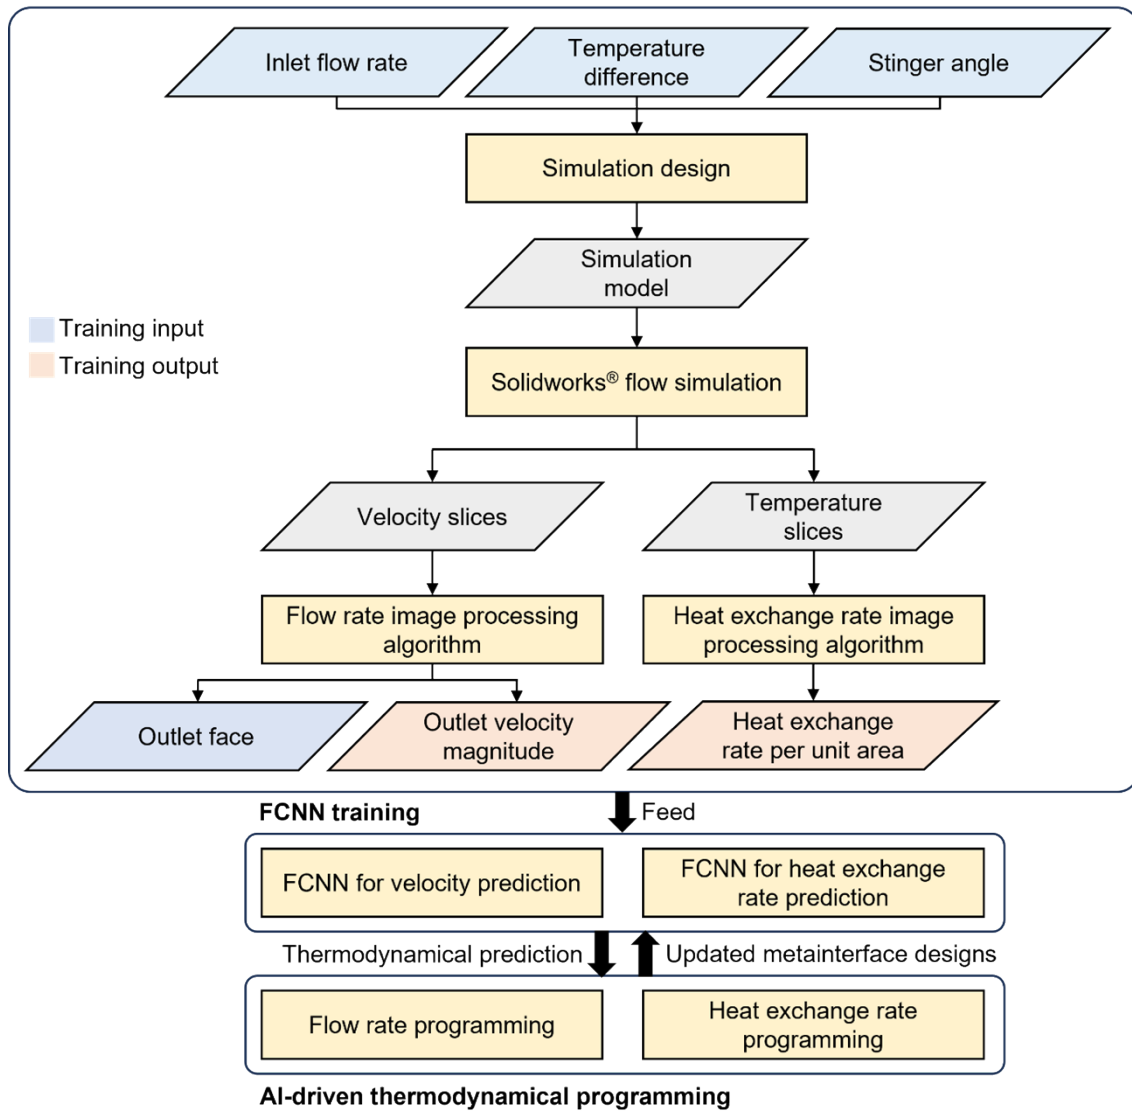

145  
 146 Figure S11. Flowcharts of machine learning process.

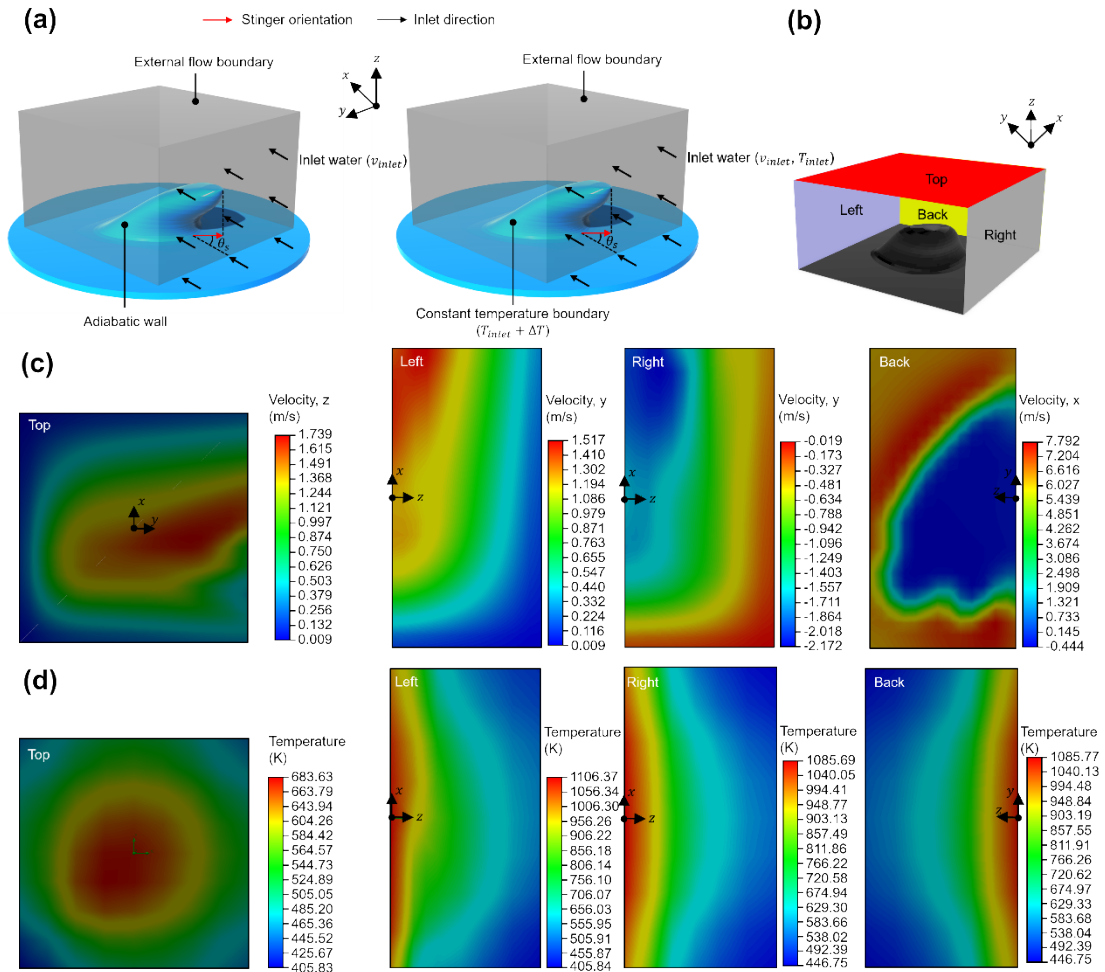

148  
 149 Figure S12. Configurations for thermodynamical simulations. (a) The computational  
 150 domain and boundary condition of the simulation. (b) Different outlet faces of the  
 151 simulation. (c) The training data slices for flow rate image processing algorithm.  
 152 The training data slices for heat exchange rate image processing algorithm.



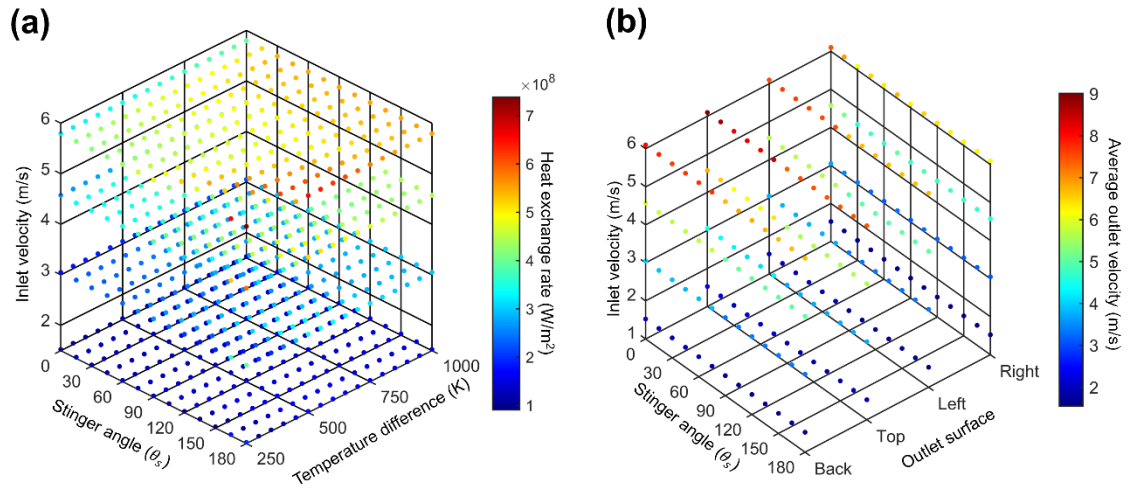

154  
 155 Figure S13. Training data distribution. (a) The heat exchange rate outputs with different  
 156 training inputs. (b) The velocity outputs with different training inputs.

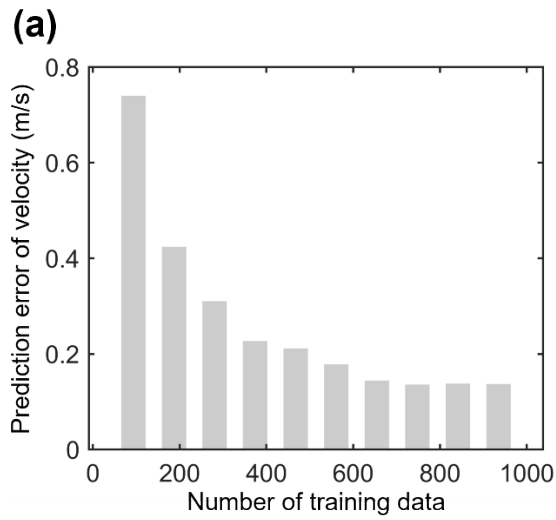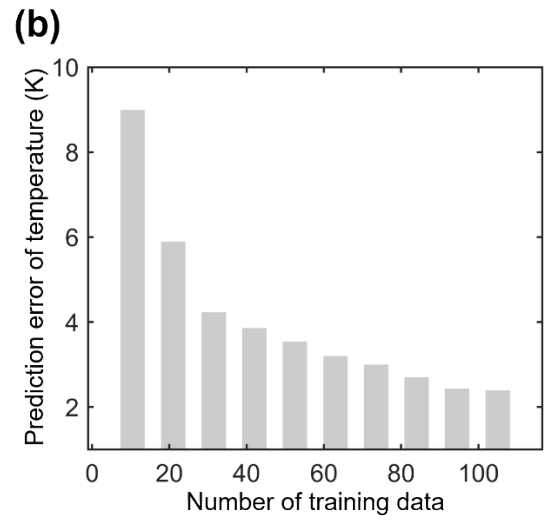

158  
159 Figure S14. Prediction test errors reduces as the number of training data increases for  
160 predicting (a) velocity, and (b) temperature.

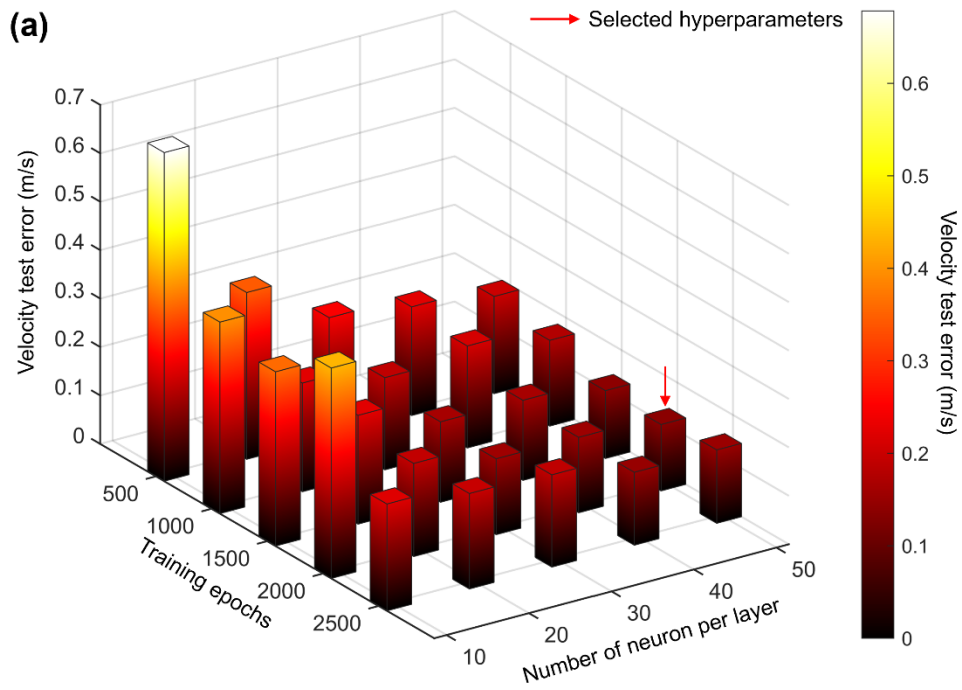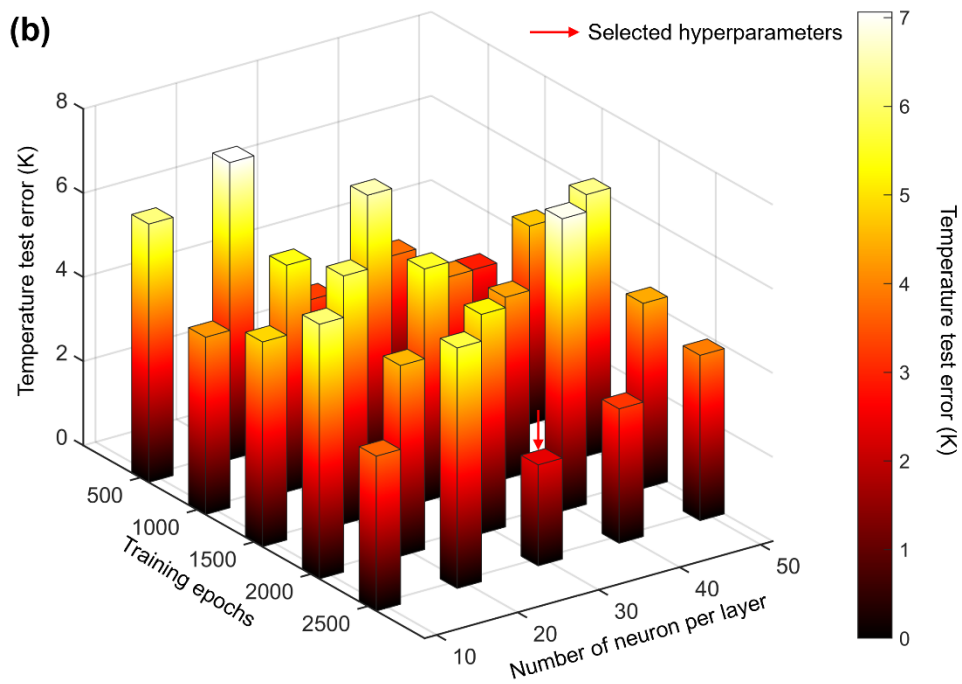

161  
 162 Figure S15. Prediction test errors for different hyperparameters of the FCNNs to  
 163 predict (a) velocity, and (b) temperature.

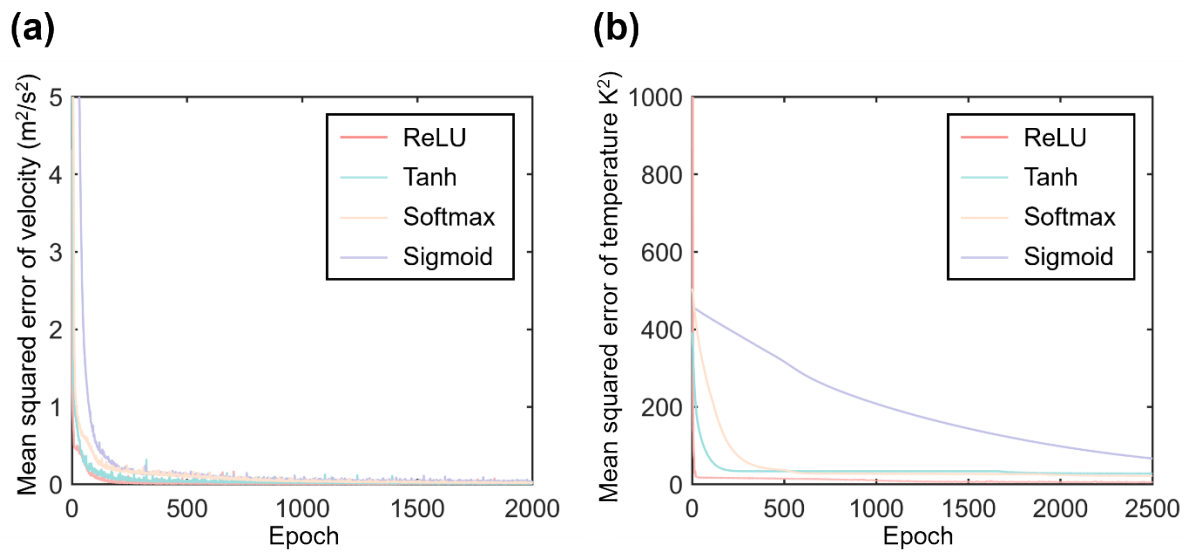

165  
 166 Figure S16. The training loss comparing different activation functions for the FCNNs  
 167 predicting (a) velocity and (b) temperature.

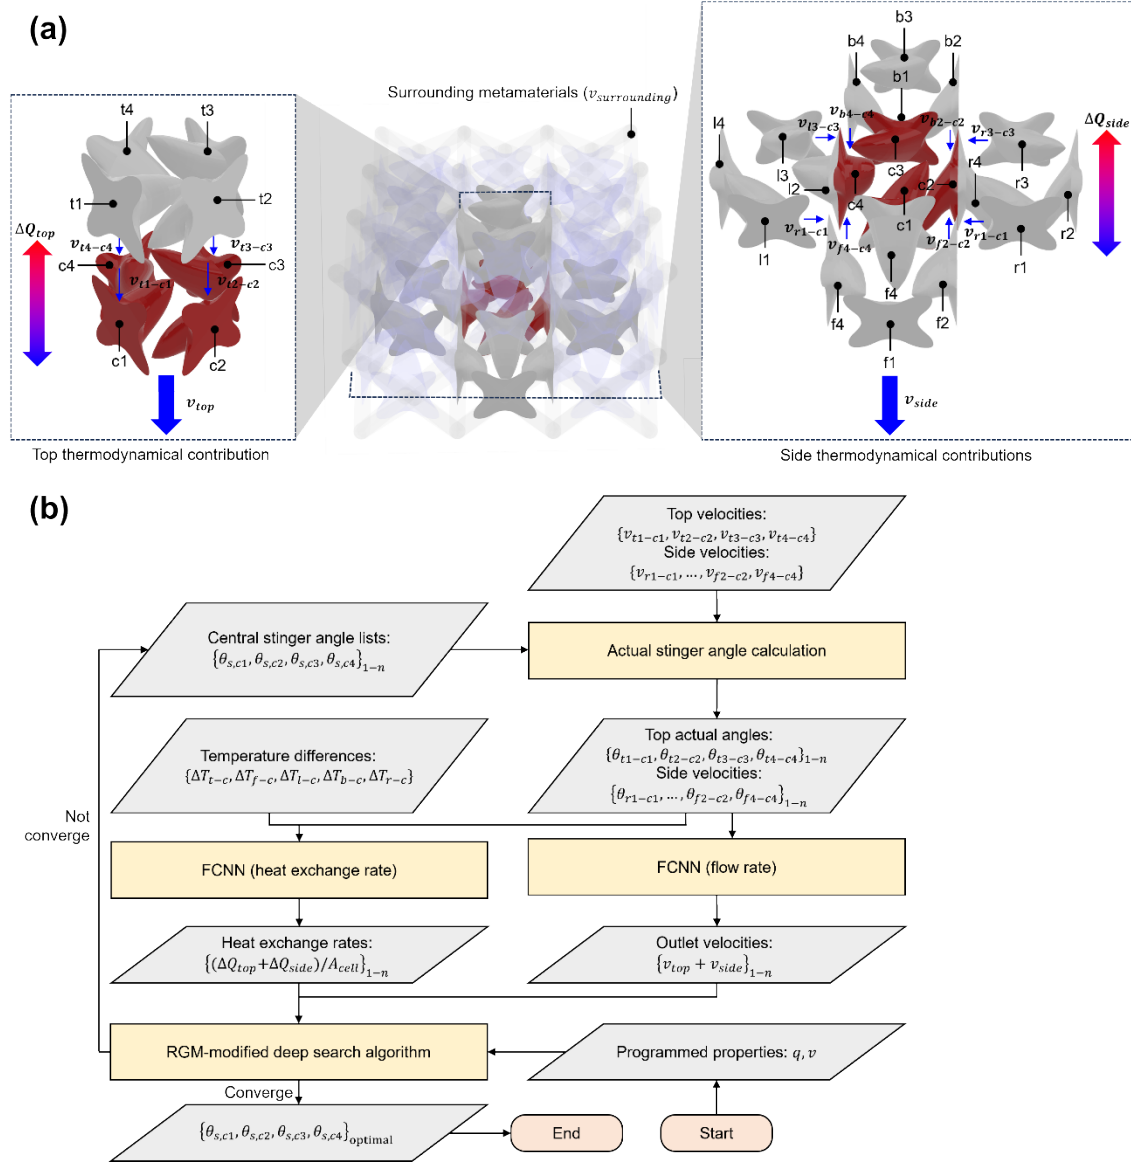

169  
 170 Figure S17. The thermodynamical programming algorithms. (a) Theoretical flow rate  
 171 and heat exchange rate design schematics and (b) flow charts of programming the flow  
 172 rate and heat exchange rate. Note that  $\theta_{s,X}$  represents the stinger angle of the stinger  $X$ ,  
 173  $v_{X-Y}$  is the flow rate from stinger  $X$  to stinger  $Y$ ,  $\theta_{X-Y}$  represents the angle between the  
 174 velocity  $v_{X-Y}$  and stinger  $Y$ ,  $\Delta T_{R1-R2}$  represents the temperature difference between the  
 175 regions  $R1$  and  $R2$ ,  $n$  is the batch size of the RGM-modified deep search algorithm,  
 176  $v_{surrounding}$  is the negative flow contribution caused by the surrounding structures of the  
 177 metamaterials,  $A_{cell}$  represents the area of a unit cells implanted with four stingers,  
 178  $\Delta Q_{top}$  and  $\Delta Q_{side}$  represent the total heat exchanged from the top flows and the side flows,  
 179 respectively,  $v_{top}$  and  $v_{side}$  are the outlet flow rates from the top flows and the side flows,  
 180 respectively,  $q$  and  $v$  represent the desired heat exchange rate and the outlet velocity,  
 181 respectively.

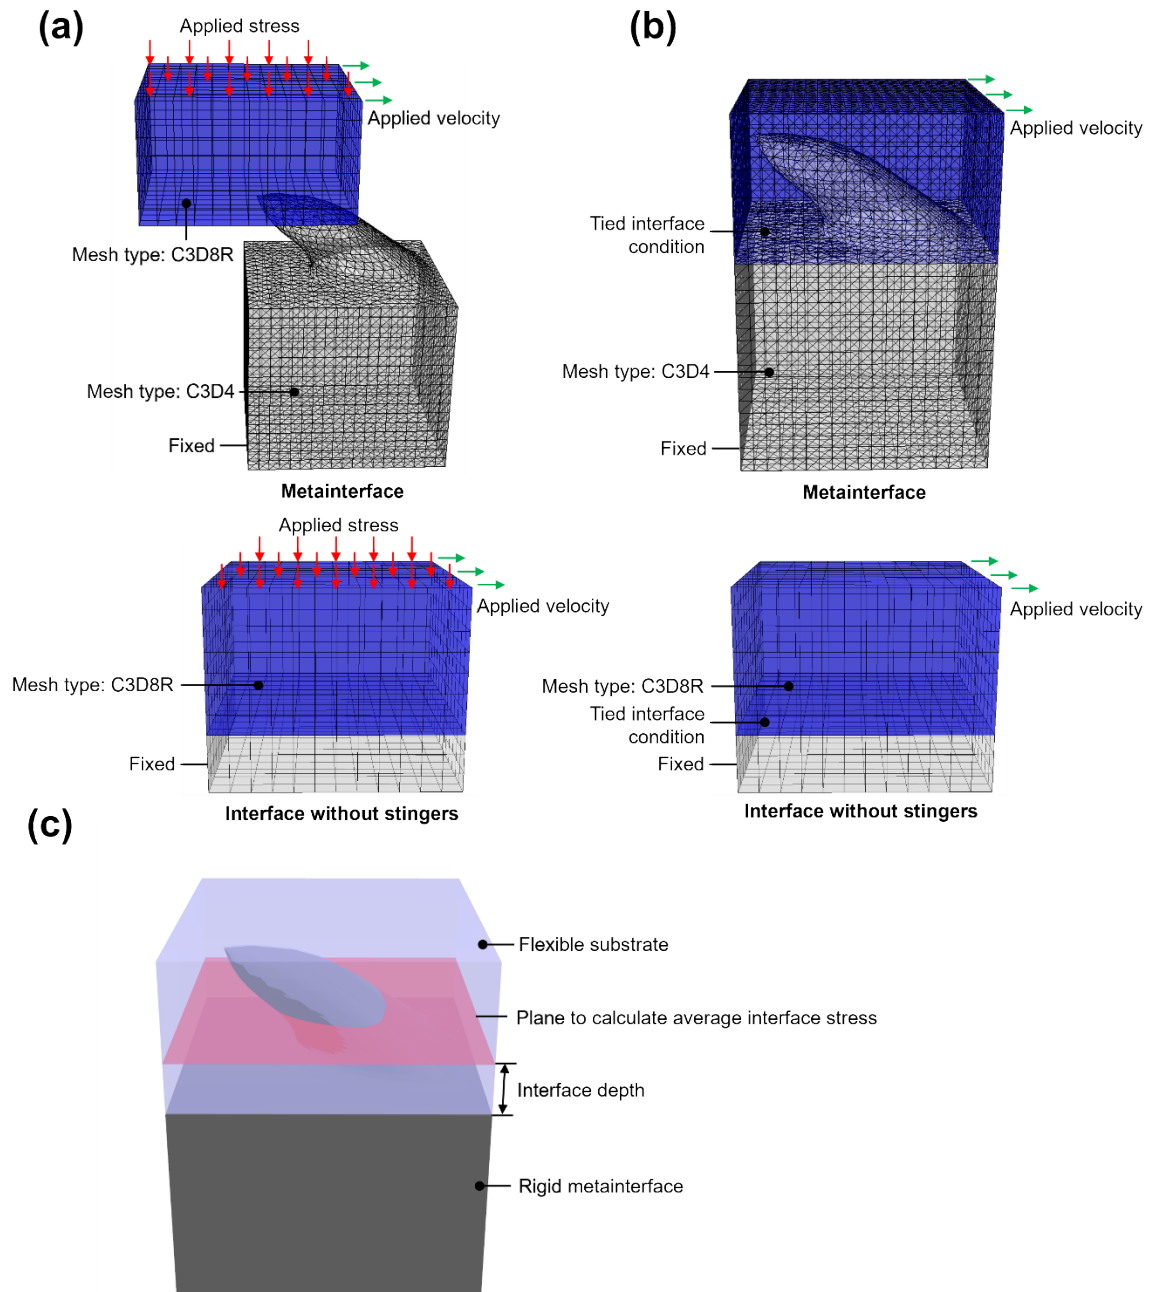

182  
 183 Figure S18. The simulation configuration to calculate the interface stresses of  
 184 metainterfaces and interfaces without stingers. (a) Uncoupled stress conditions. (b)  
 185 Coupled stress conditions. (c) The definition of the interface depth and the  
 186 corresponding plane for interface stress average calculations.

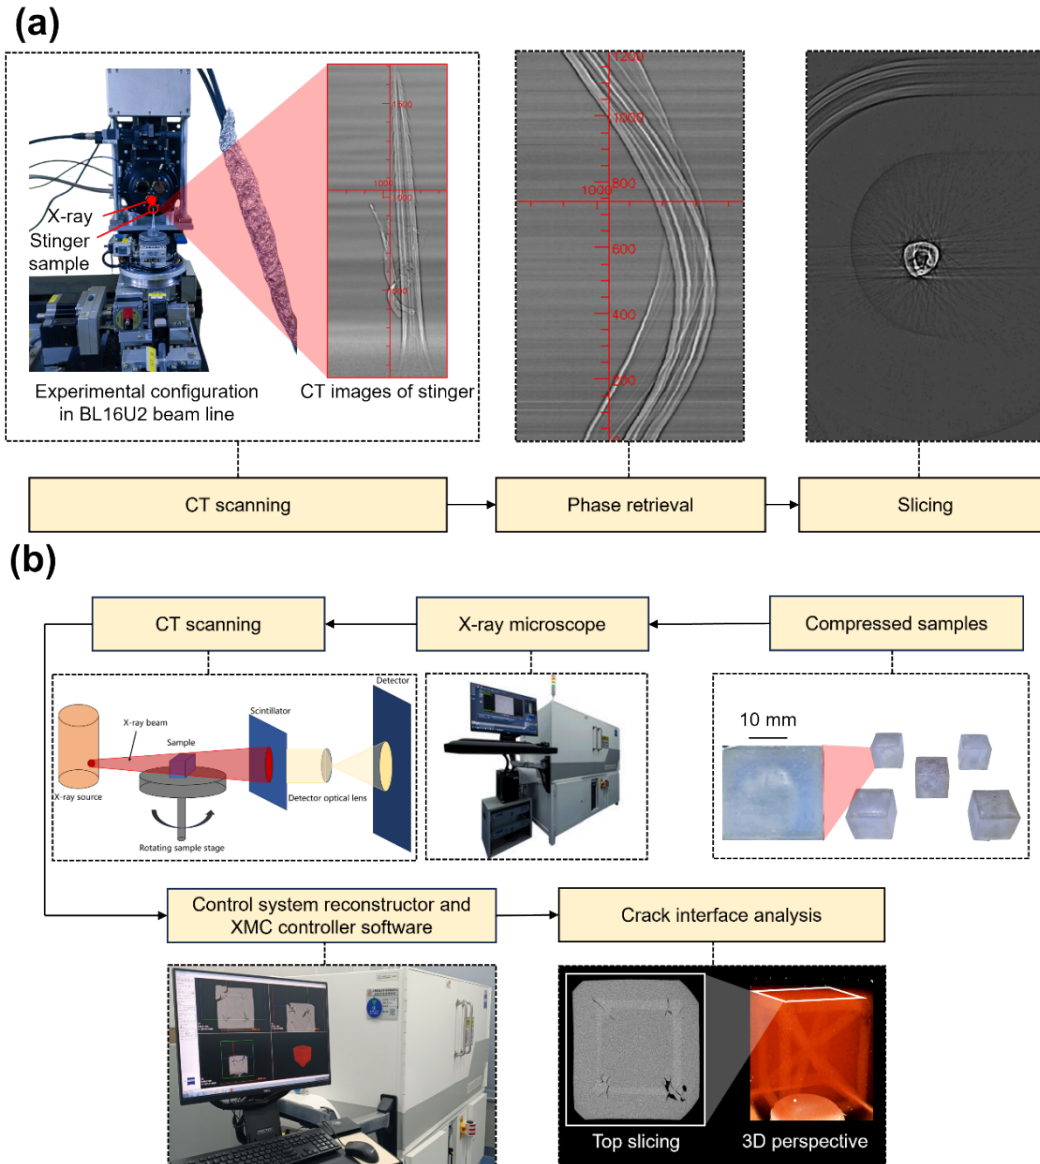

188  
 189 Figure S19. The XCT experiments. (a) Flow chart of XCT experiments using the  
 190 BL18B beamline of Shanghai Synchrotron Radiation Facility (SSRF). (b) Flow chart  
 191 of XCT experiments using the ZEISS Xradia 520 Versa X-ray microscope at  
 192 Instrumental Analysis Center of Shanghai Jiao Tong University (SJTU).

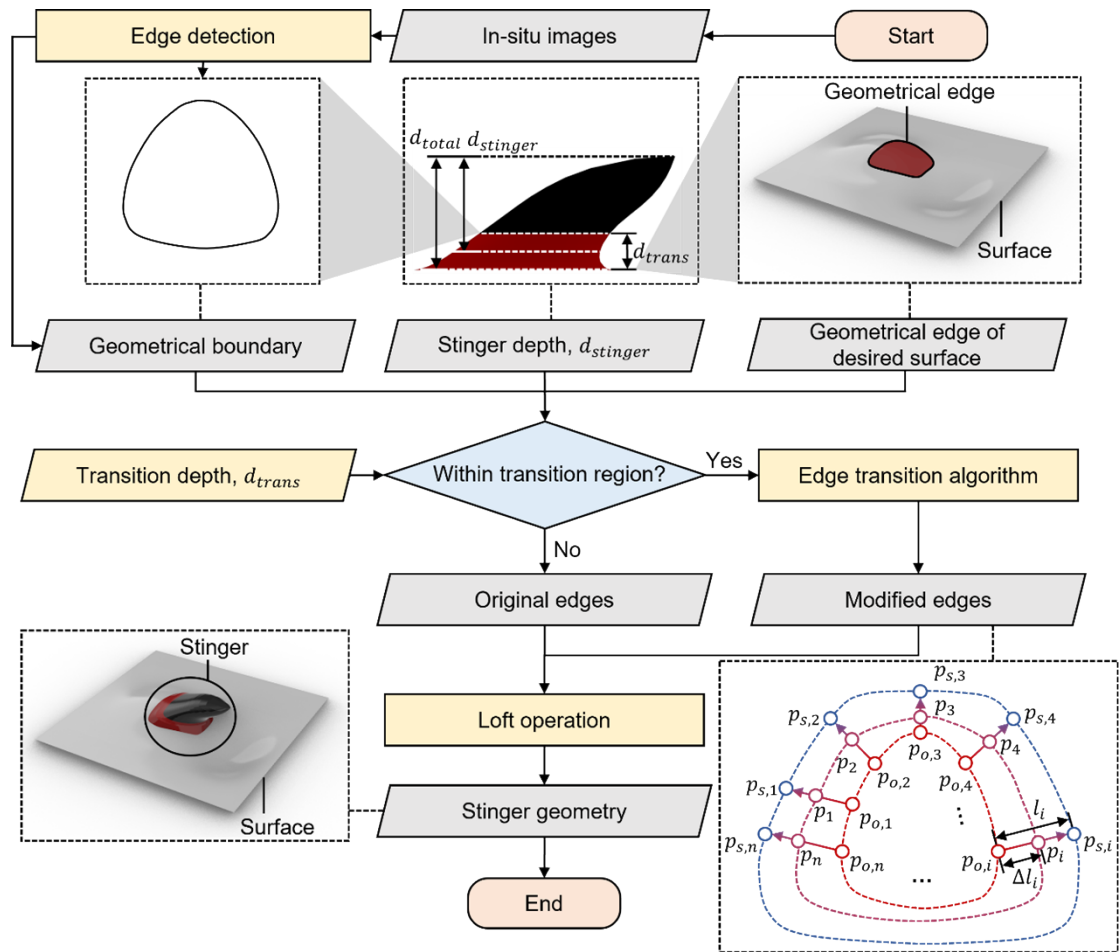

193  
 194 Figure S20. The re-construction of stinger geometries based on the XCT results on a  
 195 freeform geometry.



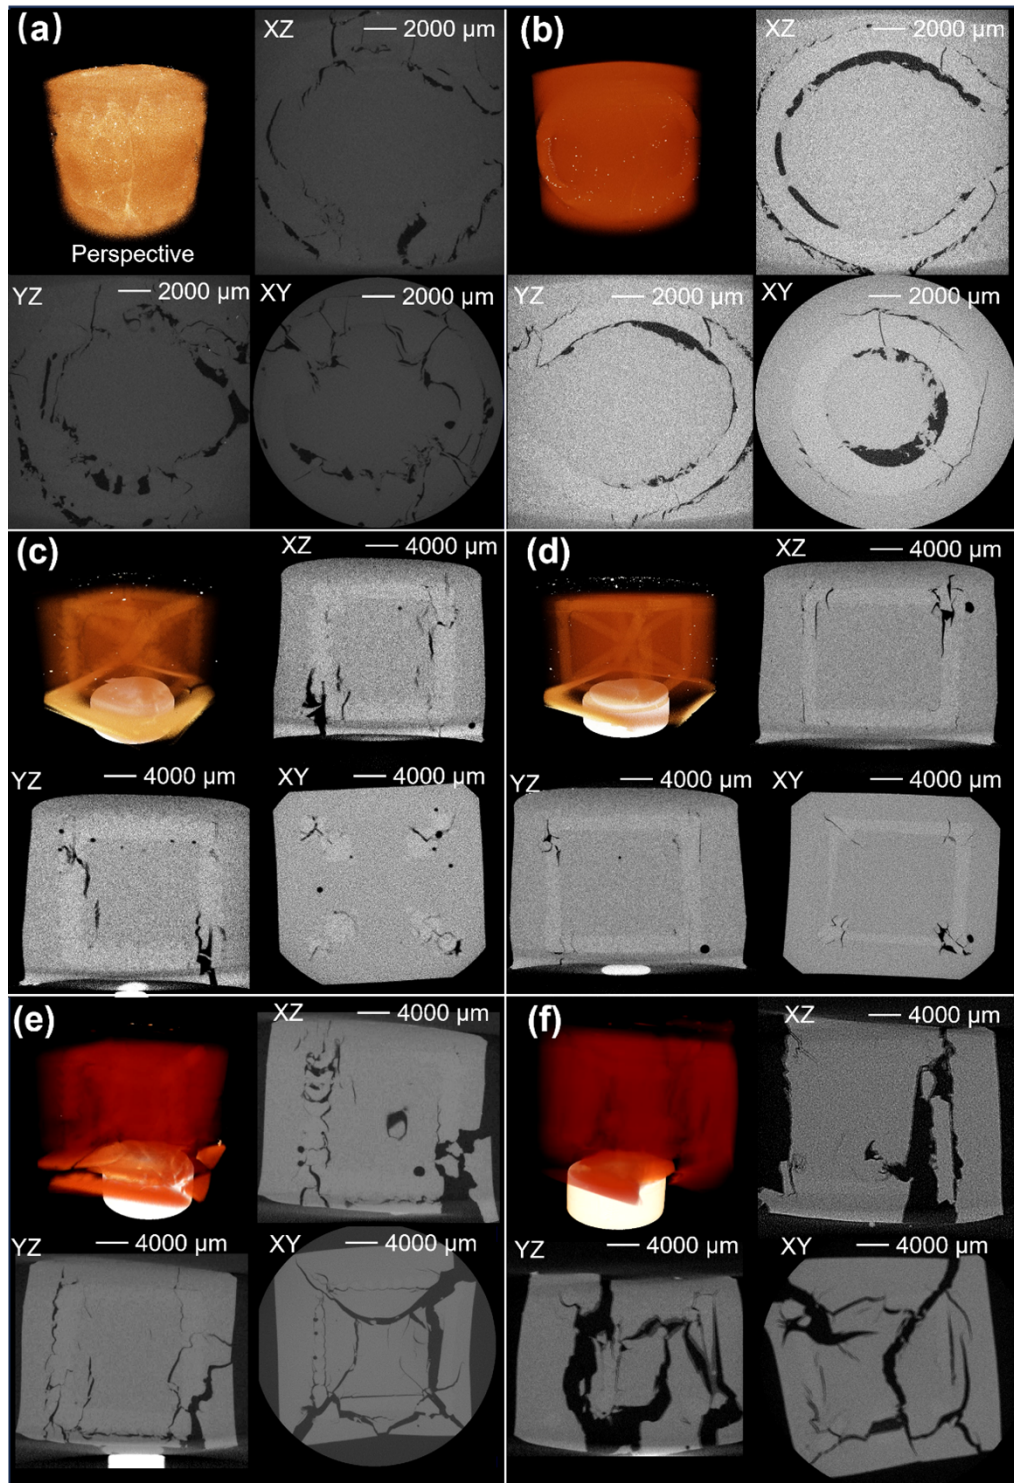

197  
 198 Figure S21. XCT images of internal interface fractures. (a) Spherical hollow structures  
 199 (SHS) metamaterials with metainterfaces. (b) SHS metamaterials with conventional  
 200 interfaces. (c) Body-centered-cubic (BCC) metamaterials with metainterfaces. (d) BCC  
 201 metamaterials with conventional interfaces. (e) Tesseract metamaterials with  
 202 conventional interfaces. (F) Tesseract metamaterials with conventional interfaces.

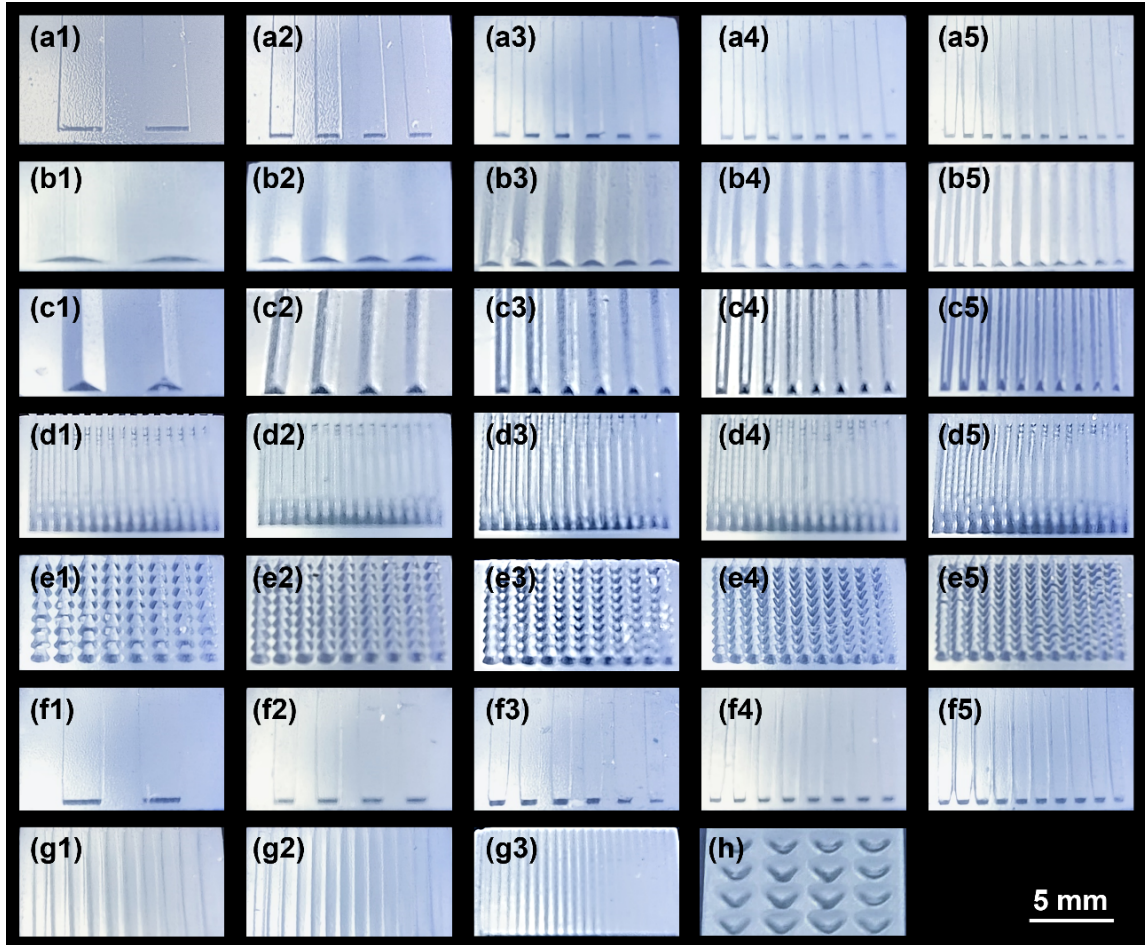

204

205 Figure S22. Interface modifications included in this study. (a1-a5) The conventional  
 206 interface modifications with rectangular shapes. (b1-b5) The conventional interface  
 207 modifications with wavy shapes. (c1-c5) The conventional interface modifications with  
 208 traingular shapes. (d1-d5) The biometric interface modifications inspired by stinger  
 209 from honeybee. (e1-e5) The biometric interface modifications inspired by stinger from  
 210 parasite. (f1-f5) The trapezium biometric interface modifications inspired by elytra of  
 211 beetle. (g1-g3) The ellipse biometric interface modifications inspired by elytra of  
 212 beetle. (h) The metainterface designed with XCT-rebuild stinger geometry of  
 213 honeybee.

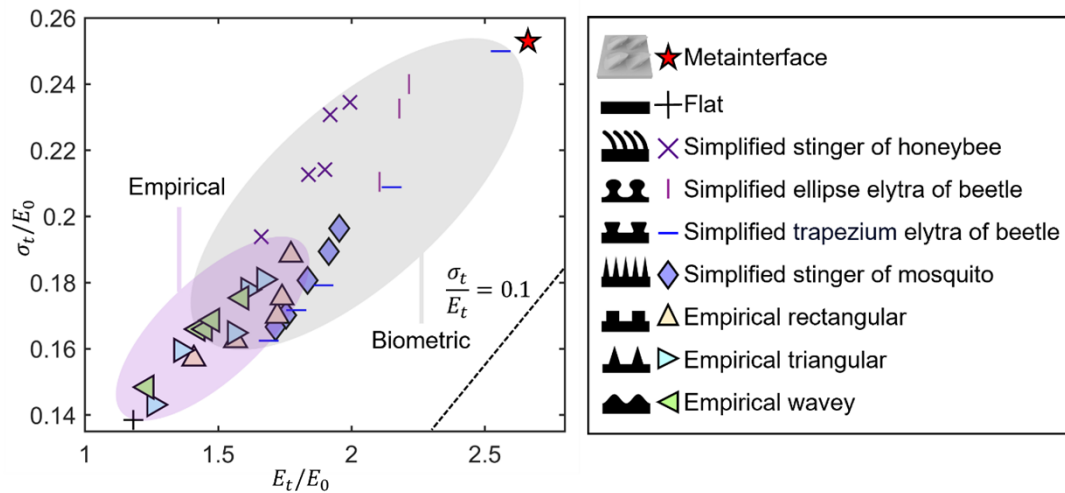

214

215 Figure S23. Ashby chart comparing the Tensile strength  $\sigma_t$  and tensile modulus  $E_s$  for  
 216 different interfaces normalized by the modulus of parent material  $E_0$  of metainterfaces  
 217 and existing interface designs including the flat interface, interface modified by  
 218 empirical conventional rectangular, traingular, and wave shapes <sup>9</sup>, inspired by stingers  
 219 of honeybee <sup>10</sup> and parasite <sup>11</sup>, and elytra of beetle with trapezium <sup>12</sup> or ellipse <sup>13</sup>  
 220 simplifications. Note that the pentagon represents the metainterface with highest tensile  
 221 strength and modulus.

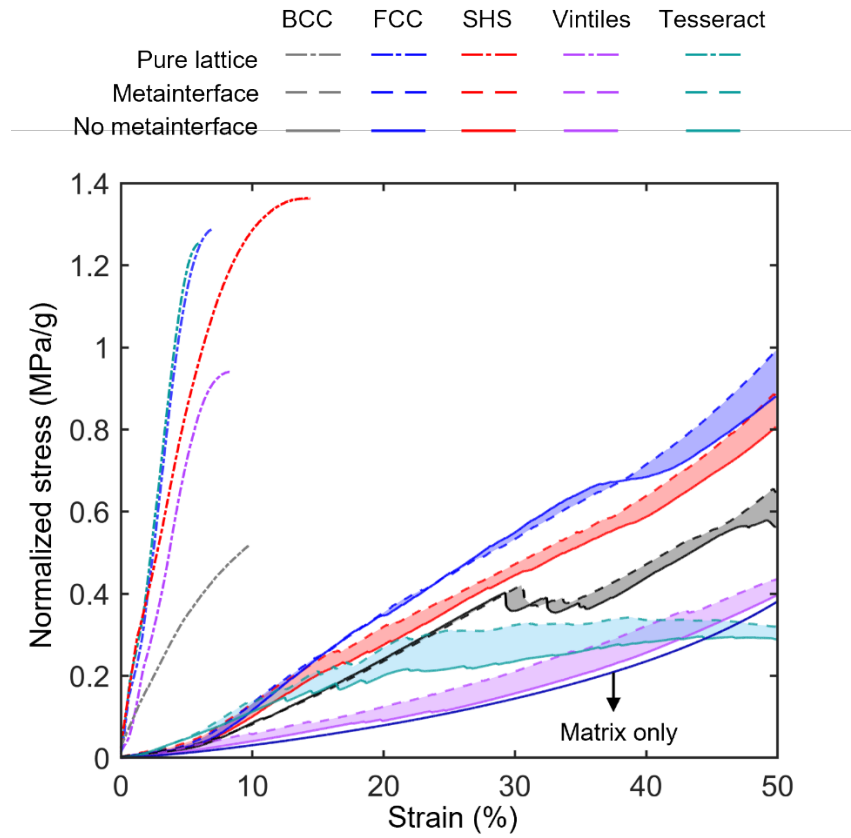

222  
 223 Figure S24. The normalized compressive stress-strain curves of pure lattice structures  
 224 fabricated with clear V4 resin, pure matrix materials prepared with flexible 80A resin,  
 225 composite metamaterials with and without programmed metainterfaces.

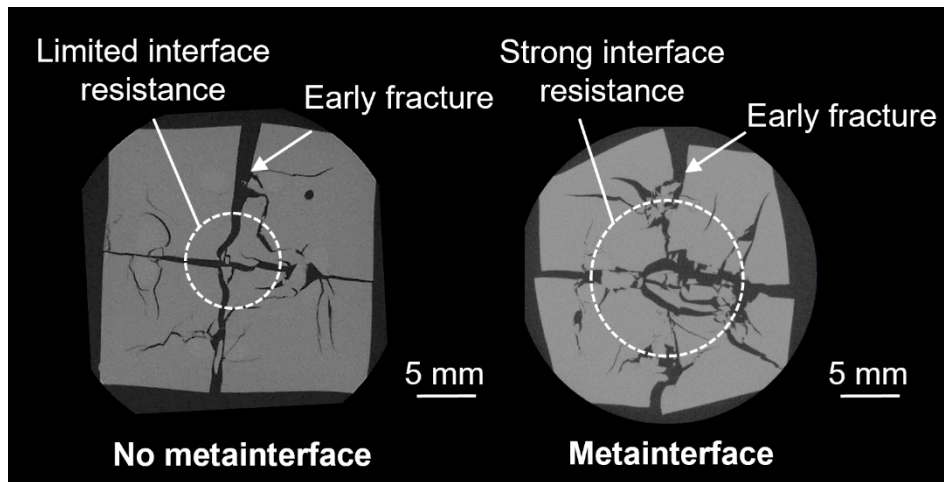

226  
227 Figure S25. The interface cracks for bending-dominated vintiles composite  
228 metamaterials with and without programmed metainterfaces.

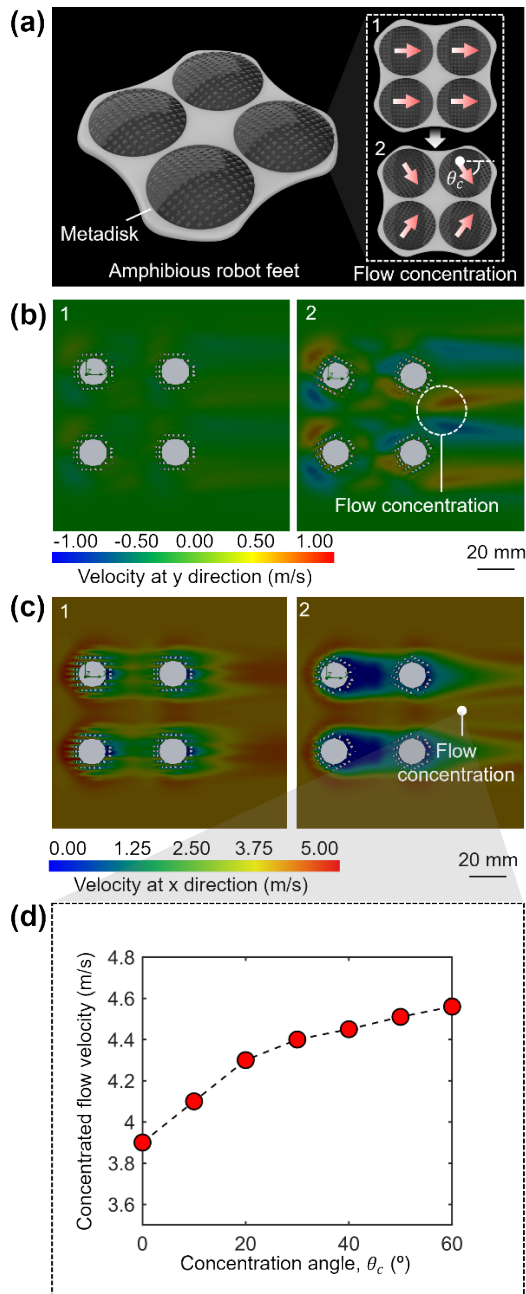

230  
 231 Figure S26. (a) Amphibious robot feet with programmable uncoupled mechanical and  
 232 thermodynamical behaviors, where the inlet flow rate is set to 4 m/s,  $\theta_c$  is the flow  
 233 concentrating angle. (b-c) Flow velocity distributions at y and x direction, respectively,  
 234 of the amphibious robot feet with  $\theta_c = 0^\circ$  and  $\theta_c = 60^\circ$ . (d) Programmable concentrated  
 235 flow velocity for different  $\theta_c$ .

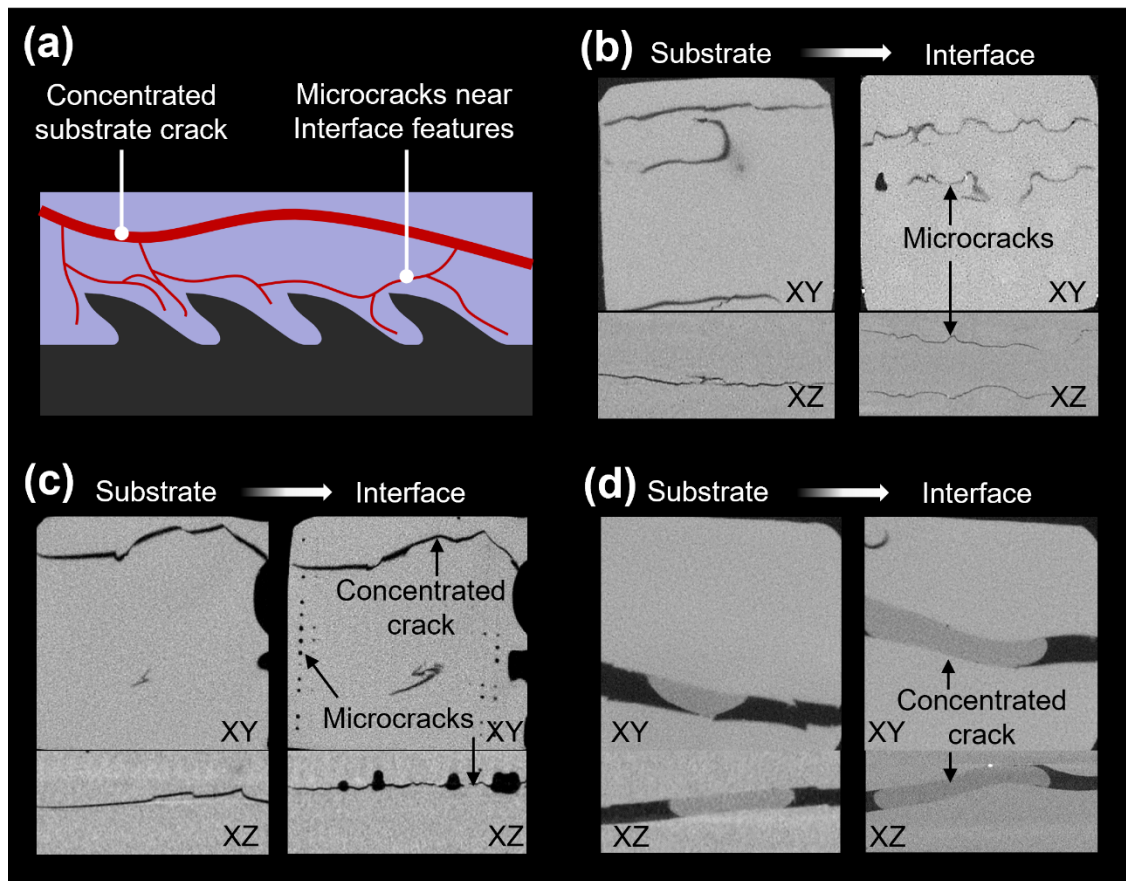

236  
 237 Figure S27. The (a) theoretical crack distribution diagram and XCT-scanned crack  
 238 extensions from the substrate to the interface design regions for (b) metainterface with  
 239 XCT-rebuild biostructure, (c) interface inspired by honeybee-stinger, and (d) interface  
 240 inspired by elytra of beetle.

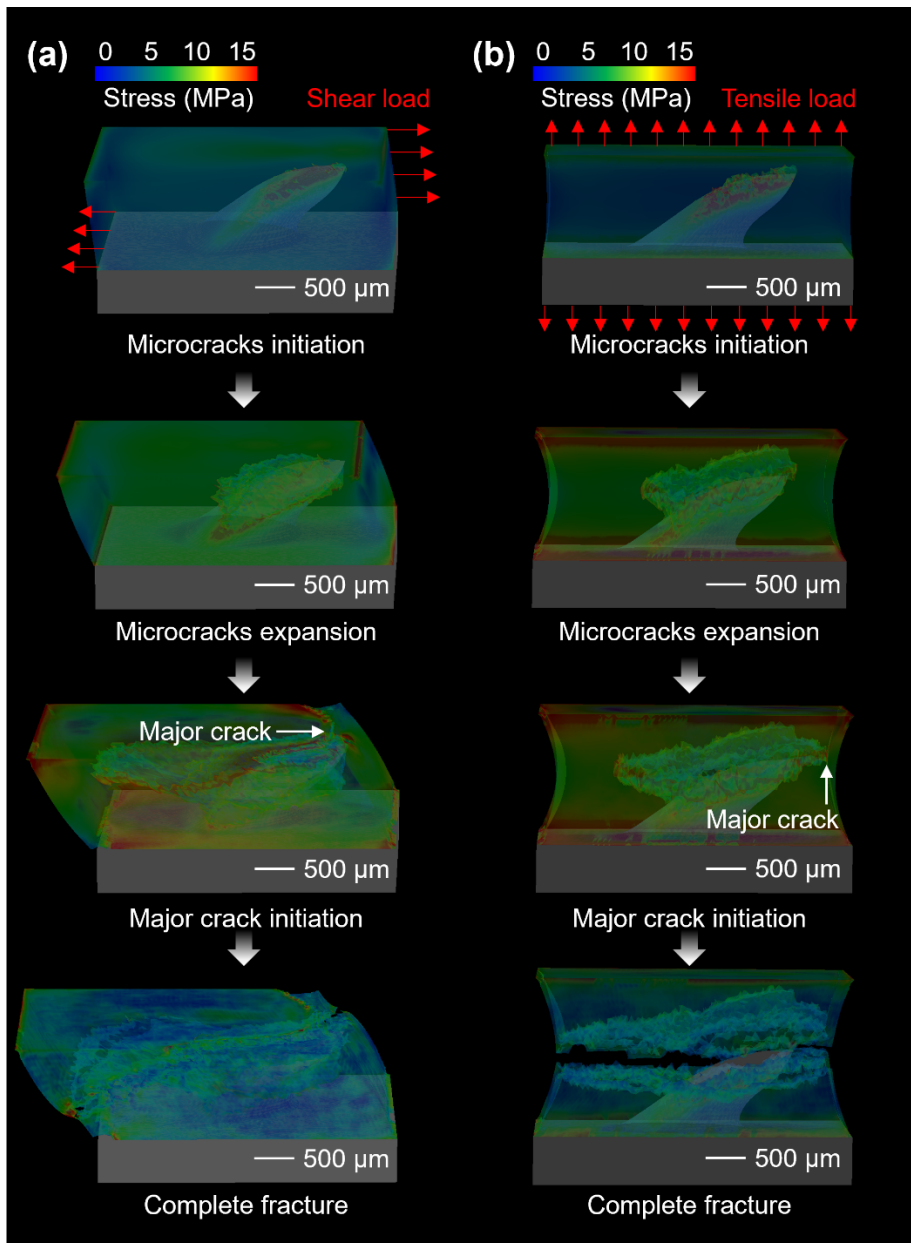

242  
 243 Figure S28. Simulated fracture process of metainterface under (a) shear and (b) tensile  
 244 load conditions.



245

→ Engineerable direction

○ Minimum designable unit

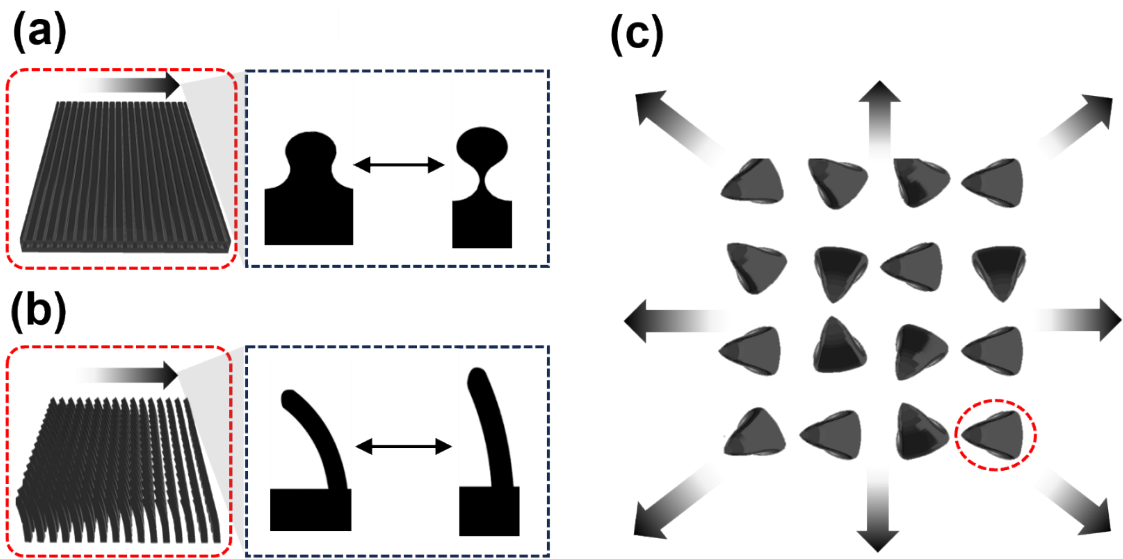

246

247

248 Figure S29. Schematic diagrams of the interface directional designability for (a)  
249 interfaces with conventional modifications or inspired by elytra of beetle, (b) interfaces  
250 inspired by stinger of honeybee, and (c) metainterfaces.

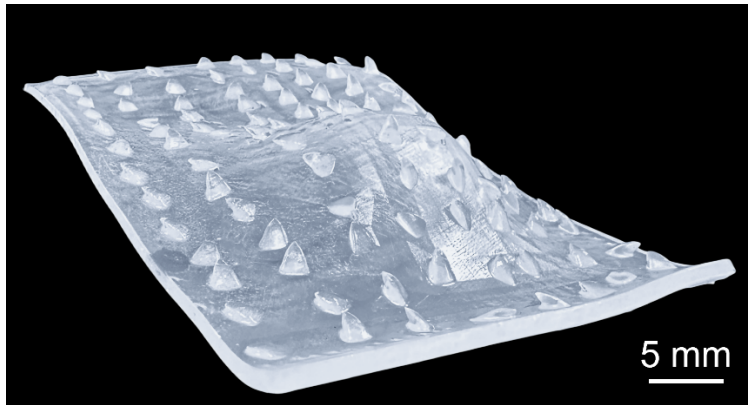

251  
252 Figure S30. Fabricated freeform metainterface.

253 Table S1. The post-processing conditions of the parent materials for different types of  
 254 experiment.

| Experiment                                                                                                    | Initial form                       | Curing time (minutes) | Curing temperature (°C) |
|---------------------------------------------------------------------------------------------------------------|------------------------------------|-----------------------|-------------------------|
| Basic mechanical properties of parent materials (standard clear)                                              | Printed solids                     | 15                    | 60                      |
| Basic mechanical properties of parent materials (flexible 80A)                                                | Printed solids or liquid           | 2.5-12                | 60                      |
| Metainterfaces and conventional interfaces for the measurement of coupled interface energy (standard clear)   | Printed solids                     | 5                     | 60                      |
| Metainterfaces and conventional interfaces for the measurement of uncoupled interface energy (standard clear) | Printed solids                     | 15                    | 60                      |
| Substrates of metainterface for the measurement of coupled interface energy (flexible 80A)                    | Printed solids with adhered liquid | 10                    | 60                      |
| Substrates of metainterface for the measurement of uncoupled interface energy (flexible 80A)                  | Printed solids                     | 10                    | 60                      |
| Vertical stress measurement (standard clear)                                                                  | Printed solids                     | 15                    | 60                      |
| Vertical stress measurement (flexible 80A)                                                                    | Printed solids                     | 10                    | 60                      |
| Metainterfaces and conventional interfaces of composite metamaterials (standard clear)                        | Printed solids                     | 3                     | 60                      |
| Metainterfaces and conventional interfaces of composite metastructures (standard clear)                       | Printed solids                     | 15                    | 60                      |
| Substrates of composite metamaterials (flexible 80A)                                                          | Liquid                             | 12                    | 60                      |
| Substrates of composite metastructures (flexible 80A)                                                         | Printed solids                     | 10                    | 60                      |

255

257 Table S2. Mechanical properties of parent materials.

| Specimen type                               | Modulus (MPa) | Ultimate tensile stress (MPa) | Fracture strain (%) |
|---------------------------------------------|---------------|-------------------------------|---------------------|
| Specimen 1<br>(flexible 80A)                | 4.45          | 3.80                          | 85.49               |
| Specimen 2<br>(flexible 80A)                | 4.41          | 3.76                          | 87.07               |
| Specimen 3<br>(flexible 80A)                | 4.47          | 3.81                          | 84.93               |
| Specimens<br>(liquid cured<br>flexible 80A) | 3.13 - 4.39   | 1.66 - 3.79                   | 53.80 - 86.75       |
| Specimen 1<br>(standard clear)              | 1662.52       | 48.97                         | 8.36                |
| Specimen 2<br>(standard clear)              | 1655.43       | 46.35                         | 9.15                |
| Specimen 3<br>(standard clear)              | 1669.34       | 50.23                         | 7.97                |

258

259 Table S3. Summary of weights for the components of composite metamaterials.

| Topology  | Diameter or thickness of samples (mm) | Interface type        | Struct diameter (mm) | Relative density (%) | Assembly type           | Weight (g) |
|-----------|---------------------------------------|-----------------------|----------------------|----------------------|-------------------------|------------|
| BCC       | 2                                     | Without metainterface | 1.00                 | 6.44                 | With flexible matrix    | 13.51      |
|           |                                       |                       |                      |                      | Without flexible matrix | 0.87       |
|           |                                       | With metainterface    | 0.84                 | 6.62                 | With flexible matrix    | 13.45      |
|           |                                       |                       |                      |                      | Without flexible matrix | 0.89       |
| FCC       | 2                                     | Without metainterface | 1.00                 | 9.57                 | With flexible matrix    | 13.38      |
|           |                                       |                       |                      |                      | Without flexible matrix | 1.28       |
|           |                                       | With metainterface    | 0.91                 | 9.53                 | With flexible matrix    | 13.74      |
|           |                                       |                       |                      |                      | Without flexible matrix | 1.31       |
| SHS       | 1                                     | Without metainterface | 1.00                 | 4.33                 | With flexible matrix    | 13.62      |
|           |                                       |                       |                      |                      | Without flexible matrix | 0.59       |
|           |                                       | With metainterface    | 0.85                 | 4.24                 | With flexible matrix    | 13.43      |
|           |                                       |                       |                      |                      | Without flexible matrix | 0.57       |
| Vintiles  | 2                                     | Without metainterface | 1.00                 | 4.17                 | With flexible matrix    | 13.44      |
|           |                                       |                       |                      |                      | Without flexible matrix | 0.56       |
|           |                                       | With metainterface    | 0.93                 | 4.42                 | With flexible matrix    | 13.34      |
|           |                                       |                       |                      |                      | Without flexible matrix | 0.59       |
| Tesseract | 2                                     | Without metainterface | 1.00                 | 7.01                 | With flexible matrix    | 13.70      |
|           |                                       |                       |                      |                      | Without flexible matrix | 0.96       |
|           |                                       | With metainterface    | 0.88                 | 7.10                 | With flexible matrix    | 13.10      |
|           |                                       |                       |                      |                      | Without flexible matrix | 0.93       |
| NA        | NA                                    | NA                    | NA                   | NA                   | Pure matrix             | 13.47      |

261 Table S4. Summary of weights for the components of composite metastructures.

| Type of composite metastructures               | Thickness design of each rigid sheet (mm) | Average weight of each rigid sheet (g) | Thickness design of flexible matrix between the sheets (mm) | Average weight of flexible matrix (g) | Density (g/cm <sup>3</sup> ) | Sheet-to-matrix volume ratio (%) |
|------------------------------------------------|-------------------------------------------|----------------------------------------|-------------------------------------------------------------|---------------------------------------|------------------------------|----------------------------------|
| Composite metastructure without metainterfaces | 1                                         | 0.49                                   | 3.5                                                         | 13.65                                 | 1.1                          | 3.6                              |
| Composite metastructure with metainterfaces    | 0.5                                       | 0.51                                   | 4                                                           | 13.58                                 | 1.1                          | 3.7                              |

262

263 Table S5. Summary of design information and relative densities for the thermos-  
 264 mechanical metamaterial and its conventional counterpart designed in this work.

| Type of metamaterials            | Beam diameter (mm) | Average relative densities (%) | Average normalized modulus (MPa/MPa) |
|----------------------------------|--------------------|--------------------------------|--------------------------------------|
| Thermos-mechanical metamaterials | 0.416              | 20.7                           | 0.18                                 |
| Conventional metamaterials       | 0.5                | 20.7                           | 0.17                                 |

265

266 Table S6. The hyperparameters used in FCNNs.

| Type of FCNN                | FCNN for velocity prediction | FCNN for temperature prediction |
|-----------------------------|------------------------------|---------------------------------|
| Number of hidden layers     | 2                            | 2                               |
| Number of neurons per layer | 50                           | 30                              |
| Training epochs             | 2000                         | 2500                            |
| Activation function         | ReLU                         | ReLU                            |



268 Table S7. The design parameters of the interfaces used in this study.

| Interface design                                         | Parameter type          | Parameter range               |
|----------------------------------------------------------|-------------------------|-------------------------------|
| Programmable metainterface with XCT-rebuild biostructure | Stinger angle           | 0 to 180 degrees              |
| Interface inspired by elytra of beetle (ellipse)         | Blade angle             | 15 to 40 degrees              |
| Interface inspired by elytra of beetle (trapezium)       | Tooth width             | 0.5 to 2.5 mm                 |
| Interface inspired by stinger of parasite                | Stinger densities       | 0.64 to 1.44 mm <sup>-2</sup> |
| Interface inspired by stinger of honeybee                | Bending curvature       | 1 to 2.5 mm <sup>-1</sup>     |
| Interface modified by rectangular geometry               | Size of the rectangle   | 0.5 to 2.5 mm                 |
| Interface modified by triangular geometry                | Size of triangular base | 0.5 to 2.5 mm                 |
| Interface modified by wavey geometry                     | Size of wave periods    | 1 to 5 mm                     |

269

270 **Captions for supplementary movies**

- 271 Movie S1 (separate file). Comparison of internal fractures between metainterface with  
272 XCT-rebuild biostructures and biometric interfaces.
- 273 Movie S2 (separate file). Comparison of internal fractures for face-centered-cubic  
274 (FCC) metamaterials.
- 275 Movie S3 (separate file). Comparison of internal fractures for BCC metamaterials.
- 276 Movie S4 (separate file). Comparison of internal fractures for tesseract metamaterials.
- 277 Movie S5 (separate file). Comparison of internal fractures for SHS metamaterials.
- 278 Movie S6 (separate file). Comparison of internal fractures for vintiles metamaterials.
- 279 Movie S7 (separate file). Motion and programmed interface mechanics of robotics  
280 exoskeleton.

281 **References**

- 282 1. H. Ayhan, N. Özyurt Koçakoğlu and S. Candan, *Microscopy Research and*  
283 *Technique*, 2021, **84**, 2930-2935.
- 284 2. M. Meyers, A. Lin, Y. Lin, E. Olevsky and S. Georgalis, *Jom*, 2008, **60**, 19-24.
- 285 3. Z.-L. Zhao, H.-P. Zhao, G.-J. Ma, C.-W. Wu, K. Yang and X.-Q. Feng, *Biology*  
286 *open*, 2015, **4**, 921-928.
- 287 4. Y. Lu, T. Ren, H. Zhang, Q. Jin, L. Shen, M. Shan, X. Zhao, Q. Chen, H. Dai and  
288 L. Yao, *Acta Biomaterialia*, 2022, **153**, 386-398.
- 289 5. M. Sahlabadi and P. Hutapea, *Bioinspiration & Biomimetics*, 2018, **13**, 036013.
- 290 6. Z. Chen, Y. Lin, W. Lee, L. Ren, B. Liu, L. Liang, Z. Wang and L. Jiang, *ACS*  
291 *applied materials & interfaces*, 2018, **10**, 29338-29346.
- 292 7. J. Ling, Z. Song, J. Wang, K. Chen, J. Li, S. Xu, L. Ren, Z. Chen, D. Jin and L.  
293 Jiang, *Journal of the mechanical behavior of biomedical materials*, 2017, **68**,  
294 173-179.
- 295 8. J. Černý, F. Weyda, M. Perlík and D. Kodrík, *Microscopy and Microanalysis*,  
296 2022, **28**, 1808-1818.
- 297 9. L. Wang, Y. Liu, Y. Yang, Y. Li and M. Bai, *Additive Manufacturing*, 2021, **42**,  
298 101992.
- 299 10. D. Han, R. S. Morde, S. Mariani, A. A. La Mattina, E. Vignali, C. Yang, G.  
300 Barillaro and H. Lee, *Advanced Functional Materials*, 2020, **30**, 1909197.
- 301 11. S. Y. Yang, E. D. O'Cearbhaill, G. C. Sisk, K. M. Park, W. K. Cho, M. Villiger,  
302 B. E. Bouma, B. Pomahac and J. M. Karp, *Nature communications*, 2013, **4**,  
303 1702.
- 304 12. Y. Ni, H. Bai, Z. Wang, H. Liao and W. Wu, *Composite Structures*, 2023,  
305 117220.
- 306 13. J. Rivera, M. S. Hosseini, D. Restrepo, S. Murata, D. Vasile, D. Y. Parkinson, H.  
307 S. Barnard, A. Arakaki, P. Zavattieri and D. Kisailus, *Nature*, 2020, **586**, 543-  
308 548.
